# Supplementary material for: Should We ‘Eat a Rainbow’? An Umbrella Review of the Health Effects of Colorful Bioactive Pigments in Fruits and Vegetables
Source: MDPI journal article supplement (doi:10.3390/molecules27134061), 2022-06-24
Supplement: s1 [file s1]

**Table S1.** Summary of the number of SLRs and MAs included in this umbrella review, by bioactive pigment sourced from fruit or vegetables and health outcome.

| PIGMENT                                | NUMBER OF SLRS INCLUDED | NUMBER OF MA INCLUDED | NUMBER OF DOSE-RESPONSE MA INCLUDED | TOTAL NUMBER OF ORIGINAL RESEARCH STUDIES <sup>a</sup> | OUTCOME TYPES EVALUATED                                                                                                                                        | NUMBER OF SIGNIFICANT HEALTH EFFECTS                                                                                                                                                         |
|----------------------------------------|-------------------------|-----------------------|-------------------------------------|--------------------------------------------------------|----------------------------------------------------------------------------------------------------------------------------------------------------------------|----------------------------------------------------------------------------------------------------------------------------------------------------------------------------------------------|
| <b>Major pigment classes</b>           |                         |                       |                                     |                                                        |                                                                                                                                                                |                                                                                                                                                                                              |
| Carotenoids<br>(Red/orange/<br>yellow) | 4                       | 12                    | 0                                   | 62                                                     | Cognitive function (n=1 MA)<br>CVD (n=3 MA)<br>Obesity (n=8 MA)                                                                                                | Cognitive function (n=1 MA)<br>CVD (n=2 MA)<br>Obesity (n=5 MA)<br><b>Total N=8 MA (67%)</b>                                                                                                 |
| <b>Pigment sub-classes</b>             |                         |                       |                                     |                                                        |                                                                                                                                                                |                                                                                                                                                                                              |
| Alpha-carotene<br>(Yellow)             | 16                      | 41                    | 13                                  | 193                                                    | Bone health (n=1 MA)<br>Cancer (n=29 MA)<br>Eye health (n=2 MA)<br>Mortality (n=3 MA)<br>Nervous system (n=1 MA)<br>Pregnancy health (n=1 MA)<br>T2DM (n=4 MA) | Bone health (n=0 MA)<br>Cancer (n=14 MA)<br>Eye health (n=0 MA)<br>Mortality (n=3 MA)<br>Nervous system (n=0 MA)<br>Pregnancy health (n=0 MA)<br>T2DM (n=1 MA)<br><b>Total N=18 MA (44%)</b> |
| Anthocyanidin<br>(Red/purple/blue)     | 5                       | 7                     | 1                                   | 35                                                     | Cancer (n=3 MA)<br>CVD (n=1 MA)<br>Mortality (n=2 MA)<br>T2DM (n=1 MA)                                                                                         | Cancer (n=2 <sup>b</sup> MA)<br>CVD (n=1 MA)<br>Mortality (n=2 MA)<br>T2DM (n=1 MA)<br><b>Total N=6 MA (86%)</b>                                                                             |

|                                  |    |    |    |     |                                                                                                                                                                                                                                               |                                                                                                                                                                                                                                                                                         |
|----------------------------------|----|----|----|-----|-----------------------------------------------------------------------------------------------------------------------------------------------------------------------------------------------------------------------------------------------|-----------------------------------------------------------------------------------------------------------------------------------------------------------------------------------------------------------------------------------------------------------------------------------------|
| Anthocyanin<br>(Red/purple/blue) | 18 | 81 | 0  | 729 | Cancer (n=8 MA)<br>CVD (n=45 MA)<br>Exercise (n=26 MA)<br>Obesity (n=2 MA)                                                                                                                                                                    | Cancer (n=1 MA)<br>CVD (n=26 MA)<br>Exercise (n=10 MA)<br>Obesity (n=2 MA)<br><b>Total N=39 MA (48%)</b>                                                                                                                                                                                |
| Beta-carotene<br>(Orange)        | 33 | 74 | 16 | 478 | Bone health (n=3 MA)<br>Cancer (n=44 MA)<br>Cognitive function (n=1 MA)<br>CVD (n=13 MA)<br>Eye health (n=2 MA)<br>Mortality (n=4 MA)<br>Nervous system (n=1 MA)<br>Pregnancy health (n=1 MA)<br>Respiratory health (n=1 MA)<br>T2DM (n=4 MA) | Bone health (n=2 MA)<br>Cancer (n=18 MA)<br>Cognitive function (n=0 MA)<br>CVD (n=5 <sup>c</sup> MA)<br>Eye health (n=1 MA)<br>Mortality (n=4 MA)<br>Nervous system (n=0 MA)<br>Pregnancy health (n=1 MA)<br>Respiratory health (n=0 MA)<br>T2DM (n=3 MA)<br><b>Total N=34 MA (46%)</b> |
| Beta-cryptoxanthin<br>(Red)      | 15 | 33 | 7  | 127 | Bone health (n=3 MA)<br>Cancer (n=18 MA)<br>CVD (n=2 MA)<br>Eye health (n=2 MA)<br>Mortality (n=3 MA)<br>Nervous system (n=1 MA)<br>T2DM (n=4 MA)                                                                                             | Bone health (n=1 MA)<br>Cancer (n=4 MA)<br>CVD (n=1 MA)<br>Eye health (n=0 MA)<br>Mortality (n=3 MA)<br>Nervous system (n=0 MA)<br>T2DM (n=1 MA)<br><b>Total N=10 MA (30%)</b>                                                                                                          |
| Flavones (White)                 | 11 | 19 | 2  | 95  | Cancer (n=11 MA)<br>CVD (n=4 MA)<br>Mortality (n=3 MA)<br>T2DM (n=1 MA)                                                                                                                                                                       | Cancer (n=5 MA)<br>CVD (n=2 MA)<br>Mortality (n=2 MA)<br>T2DM (n=0 MA)<br><b>Total N=9 MA (47%)</b>                                                                                                                                                                                     |
| Flavonols (Pale<br>yellow)       | 17 | 33 | 4  | 279 | Cancer (n=12 MA)                                                                                                                                                                                                                              | Cancer (n=5 MA)                                                                                                                                                                                                                                                                         |

|                                |    |    |    |     |                                                                                                                                                                                 |                                                                                                                                                                                                              |
|--------------------------------|----|----|----|-----|---------------------------------------------------------------------------------------------------------------------------------------------------------------------------------|--------------------------------------------------------------------------------------------------------------------------------------------------------------------------------------------------------------|
|                                |    |    |    |     | CVD (n=16 MA)<br>Mortality (n=3 MA)<br>Obesity (n=1 MA)<br>T2DM (n=1 MA)                                                                                                        | CVD (n=13 MA)<br>Mortality (n=1 MA)<br>Obesity (n=0 MA)<br>T2DM (n=1 MA)<br><b>Total N=20 MA (61%)</b>                                                                                                       |
| Lutein (Yellow)                | 7  | 10 | 2  | 35  | Cancer (n=3 MA)<br>CVD (n=2 MA)<br>Mortality (n=1 MA)<br>Nervous system (n=1 MA)<br>Pregnancy health (n=1 MA)<br>T2DM (n=2 MA)                                                  | Cancer (n=0 MA)<br>CVD (n=1 MA)<br>Mortality (n=0 MA)<br>Nervous system (n=0 MA)<br>Pregnancy health (n=0 MA)<br>T2DM (n=2 MA)<br><b>Total N=3 MA (30%)</b>                                                  |
| Lutein and zeaxanthin (Yellow) | 13 | 31 | 9  | 132 | Bone health (n=1 MA)<br>Cancer (n=25 MA)<br>CVD (n=2 MA)<br>Eye health (n=2 MA)<br>Mortality (n=1 MA)                                                                           | Bone health (n=0 MA)<br>Cancer (n=6 MA)<br>CVD (n=1 MA)<br>Eye health (n=1 MA)<br>Mortality (n=1 MA)<br><b>Total N=9 MA (29%)</b>                                                                            |
| Lycopene (Red)                 | 25 | 65 | 11 | 382 | Bone health (n=1 MA)<br>Cancer (n=33 MA)<br>CVD (n=20 MA)<br>Eye health (n=1 MA)<br>Mortality (n=4 MA)<br>Nervous system (n=1 MA)<br>Pregnancy health (n=1 MA)<br>T2DM (n=4 MA) | Bone health (n=0 MA)<br>Cancer (n=12 MA)<br>CVD (n=7 MA)<br>Eye health (n=0 MA)<br>Mortality (n=3 MA)<br>Nervous system (n=0 MA)<br>Pregnancy health (n=0 MA)<br>T2DM (n=2 MA)<br><b>Total N=24 MA (37%)</b> |
| Zeaxanthin (Yellow)            | 2  | 3  | 1  | 6   | T2DM (n=2 MA)<br>Mortality (n=1 MA)                                                                                                                                             | T2DM (n=0 MA)<br>Mortality (n=0 MA)<br><b>Total N=0 (0%)</b>                                                                                                                                                 |

| Pigment minor sub-classes          |    |    |   |     |                                                                           |                                                                                                     |
|------------------------------------|----|----|---|-----|---------------------------------------------------------------------------|-----------------------------------------------------------------------------------------------------|
| Kaempferol (Pale yellow)           | 1  | 1  | 0 | 4   | Cancer (n=1 MA)                                                           | Cancer (n=1 MA)<br><b>Total N=1 MA (100%)</b>                                                       |
| Myricetin (Pale yellow)            | 1  | 1  | 0 | 2   | Cancer (n=1 MA)                                                           | Cancer (n=0 MA)<br><b>Total N=0 MA (0%)</b>                                                         |
| Quercetin (Pale yellow)            | 10 | 25 | 0 | 217 | Cancer (n=1 MA)<br>CVD (n=20 MA)<br>Exercise (N=2 MA)<br>Obesity (N=2 MA) | Cancer (n=0 MA)<br>CVD (n=3 MA)<br>Exercise (N=2 MA)<br>Obesity (N=0 MA)<br><b>Total N=5 (20%)</b>  |
| Proanthocyanidin (Red/purple/blue) | 5  | 11 | 1 | 62  | Cancer (n=3 MA)<br>CVD (n=5 MA)<br>Mortality (n=2 MA)<br>T2DM (n=1 MA)    | Cancer (n=1 MA)<br>CVD (n=4 MA)<br>Mortality (n=0 MA)<br>T2DM (n=0 MA)<br><b>Total N=5 MA (46%)</b> |
| Proanthocyanin (Red/purple/blue)   | 2  | 2  | 0 | 9   | CVD (n=2 MA)                                                              | CVD (n=2 MA)<br><b>Total N=2 (100%)</b>                                                             |

SLR, systematic literature review; MA, meta-analysis.

- Indicates the number of intervention groups contributing to the cumulative meta-analyses. May include duplicate original research studies if an original research study was included in more than one meta-analysis.
- One of the two significant cancer effects was a negative health effect.
- Three of the five significant CVD effects were negative health effects.

**Table S2.** Meta-analysis results of included SLRs for the health effects of total carotenoid pigments found in fruit and vegetables.

| AUTHOR                               | PIGMENT     | DESIGN | TYPE       | DOSE        | DURATION   | HEALTH OUTCOME              | EFFECT SIZE        | 95% CI       | P-VALUE |
|--------------------------------------|-------------|--------|------------|-------------|------------|-----------------------------|--------------------|--------------|---------|
| <b>Obesity &amp; Type 2 diabetes</b> |             |        |            |             |            |                             |                    |              |         |
| Yao et al.                           | Carotenoids | RCT    | Supplement | 1.2 – 60 mg | 12 – 16 wk | BMI (kg/m <sup>2</sup> )    | -0.95 <sup>a</sup> | -1.88, -0.01 | <.001*  |
| Yao et al.                           | Carotenoids | RCT    | Supplement | 1.2 – 60 mg | 12 – 16 wk | Body weight (kg)            | -2.34 <sup>a</sup> | -3.80, -0.87 | <.001*  |
| Yao et al.                           | Carotenoids | RCT    | Supplement | NR          | 12 – 16 wk | Fat ratio (%)               | -0.75 <sup>a</sup> | -1.76, 0.25  | 0.14    |
| Yao et al.                           | Carotenoids | RCT    | Supplement | NR          | 12 – 16 wk | HDL cholesterol (mg dL-1)   | 0.76 <sup>a</sup>  | 0.10, 1.41   | 0.02*   |
| Yao et al.                           | Carotenoids | RCT    | Supplement | NR          | 12 – 16 wk | LDL cholesterol (mg dL-1)   | -1.30 <sup>a</sup> | -3.23, 0.63  | 0.19    |
| Yao et al.                           | Carotenoids | RCT    | Supplement | NR          | 12 – 16 wk | Total cholesterol (mg dL-1) | -2.10 <sup>a</sup> | -3.20, -0.99 | <.001*  |
| Yao et al.                           | Carotenoids | RCT    | Supplement | 2 – 20 mg   | 12 – 16 wk | Waist circumference (cm)    | -1.84 <sup>a</sup> | -3.14, -0.54 | <.001*  |
| <b>Cognitive function</b>            |             |        |            |             |            |                             |                    |              |         |
| Davinelli et al.                     | Carotenoids | RCT    | Mixed      | 0.5 – 50 mg | 2 m – 18 y | Cognitive outcomes          | 0.14 <sup>a</sup>  | 0.08, 0.20   | <.001*  |
| <b>Cardiovascular disease</b>        |             |        |            |             |            |                             |                    |              |         |
| Law & Morris                         | Carotenoids | Cohort | Serum      | H vs L      | 12 – 14 y  | Risk of IHD                 | 0.57 <sup>b</sup>  | 0.47, 0.69   | <.001*  |
| Law & Morris                         | Carotenoids | Cohort | Diet       | H vs L      | 4 – 24 y   | Risk of IHD                 | 0.85 <sup>b</sup>  | 0.77, 0.93   | <.001*  |
| Hajizadeh-Sharafabad et al.          | Carotenoids | RCT    | Mixed      | 6 – 30 mg   | 2 – 24 y   | TNF-alpha (ph/mL)           | -0.97 <sup>c</sup> | -1.98, 0.03  | 0.06    |

BMI = body mass index; H vs L = highest dose (intervention) vs lowest dose (control); IHD = ischemic heart disease; NR = not reported; RCT = randomised controlled trial; TNF-alpha = tumor necrosis factor alpha; Total-C = total cholesterol; wk = weeks; y = years

<sup>a</sup> Standardized mean difference; <sup>b</sup> Risk ratio or relative risk; <sup>c</sup> Mean difference.

\* Significant difference favoring the intervention.

;

**Table S3.** Meta-analysis results of included SLRs for the health effects of red pigments found in fruit and vegetables.

| AUTHOR            | PIGMENT            | DESIGN      | TYPE  | DOSE                                 | DURATION | HEALTH OUTCOME                               | EFFECT SIZE       | 95% CI     | P-VALUE |
|-------------------|--------------------|-------------|-------|--------------------------------------|----------|----------------------------------------------|-------------------|------------|---------|
| Cancer            |                    |             |       |                                      |          |                                              |                   |            |         |
| Wu et al.         | Beta-cryptoxanthin | Cohort & CC | Diet  | NR (Graphic only)                    | NR       | Risk of bladder cancer                       | 0.58 <sup>a</sup> | 0.36, 0.94 | NR*     |
| Wu et al.         | Beta-cryptoxanthin | Cohort & CC | Diet  | H vs L                               | NR       | Risk of bladder cancer                       | 0.90 <sup>a</sup> | 0.80, 1.02 | NR      |
| Wu et al.         | Beta-cryptoxanthin | Cohort & CC | Serum | H vs L                               | NR       | Risk of bladder cancer                       | 0.64 <sup>a</sup> | 0.22, 1.86 | NR      |
| Hu et al.         | Beta-cryptoxanthin | CC          | Diet  | 200 µg/d vs 20 µg/d                  | 1-5 y    | Risk of breast cancer                        | 0.95 <sup>b</sup> | 0.80, 1.13 | 0.54    |
| Hu et al.         | Beta-cryptoxanthin | Cohort      | Diet  | 200 µg/d vs 20 µg/d                  | 8-14 y   | Risk of breast cancer                        | 1.03 <sup>a</sup> | 0.96, 1.11 | 0.39    |
| Panic et al.      | Beta-cryptoxanthin | Cohort      | Diet  | H vs L                               | 1-9 y    | Risk of colon cancer                         | 1.14 <sup>a</sup> | 0.62, 2.08 | NR      |
| Panic et al.      | Beta-cryptoxanthin | Cohort      | Diet  | H vs L                               | 1-9 y    | Risk of colorectal cancer                    | 1.99 <sup>a</sup> | 0.74, 1.34 | NR      |
| Panic et al.      | Beta-cryptoxanthin | CC          | Diet  | H vs L                               | 3-4 y    | Risk of colorectal cancer                    | 0.47 <sup>b</sup> | 0.12, 1.90 | NR      |
| Leoncini et al.   | Beta-cryptoxanthin | CC          | Diet  | H vs L                               | 1-8 y    | Risk of larynx cancer                        | 0.41 <sup>b</sup> | 0.33, 0.51 | NR*     |
| Gallicchio et al. | Beta-cryptoxanthin | Cohort & CC | Diet  | >56-371 µg/1000kcal/d vs <5-<46 µg/d | 6 -25 y  | Risk of lung cancer                          | 0.80 <sup>a</sup> | 0.72, 0.89 | NR*     |
| Gallicchio et al. | Beta-cryptoxanthin | Cohort & CC | Diet  | DR: Per 10 µg/d                      | 6-14 y   | Risk of lung cancer                          | 0.99 <sup>a</sup> | 0.98, 1.00 | NR      |
| Gallicchio et al. | Beta-cryptoxanthin | Cohort & CC | Serum | DR: Per 0.05 µmol/L                  | 6-10 y   | Risk of lung cancer                          | 1.14 <sup>a</sup> | 0.75, 1.72 | NR      |
| Gallicchio et al. | Beta-cryptoxanthin | Cohort & CC | Serum | 4->9 µg/dL vs <1.8-<4 µg/dL          | 6-12 y   | Risk of lung cancer or lung cancer mortality | 0.82 <sup>a</sup> | 0.40, 1.68 | NR      |
| Chen et al.       | Beta-cryptoxanthin | Cohort & CC | Diet  | H vs L                               | NR       | Risk of non-Hodgkin lymphoma                 | 0.87 <sup>a</sup> | 0.75, 1.01 | NR      |
| Chen et al.       | Beta-cryptoxanthin | Cohort & CC | Diet  | DR: Per 100 µg/d                     | NR       | Risk of non-Hodgkin lymphoma                 | 0.95 <sup>a</sup> | 0.89, 1.01 | NR      |
| Leoncini et al.   | Beta-cryptoxanthin | CC          | Diet  | H vs L                               | 1-12 y   | Risk of oral cavity and pharynx cancer       | 0.46 <sup>b</sup> | 0.29, 0.74 | NR*     |
| Huang et al.      | Beta-cryptoxanthin | Cohort & CC | Diet  | H vs L                               | NR       | Risk of pancreatic cancer                    | 0.86 <sup>b</sup> | 0.67, 1.12 | 0.28    |
| Panic et al.      | Beta-cryptoxanthin | Cohort      | Diet  | H vs L                               | 1-9 y    | Risk of rectal cancer                        | 0.68 <sup>b</sup> | 0.27, 1.74 | NR      |
| Wu et al.         | Lycopene           | Cohort & CC | Serum | H vs L                               | NR       | Risk of bladder cancer                       | 0.76 <sup>a</sup> | 0.39, 1.49 | NR      |
| Wu et al.         | Lycopene           | Cohort & CC | Diet  | H vs L                               | NR       | Risk of bladder cancer                       | 0.99 <sup>a</sup> | 0.87, 1.12 | NR      |
| Hu et al.         | Lycopene           | Cohort      | Diet  | 10,000 µg/d vs 2000 µg/d             | 2-14 y   | Risk of breast cancer                        | 0.99 <sup>a</sup> | 0.93, 1.06 | 0.77    |

|                   |          |             |       |                                       |          |                                        |                   |            |         |
|-------------------|----------|-------------|-------|---------------------------------------|----------|----------------------------------------|-------------------|------------|---------|
| Hu et al.         | Lycopene | Cohort      | Diet  | DR: At 2000 µg/d                      | NR       | Risk of breast cancer                  | 1.00 <sup>a</sup> | 0.99, 1.01 | 0.88    |
| Hu et al.         | Lycopene | Cohort      | Diet  | DR: At 3000 µg/d                      | NR       | Risk of breast cancer                  | 1.00 <sup>a</sup> | 0.99, 1.02 | 0.88    |
| Hu et al.         | Lycopene | Cohort      | Diet  | DR: At 4000 µg/d                      | NR       | Risk of breast cancer                  | 1.00 <sup>a</sup> | 0.98, 1.02 | 0.88    |
| Hu et al.         | Lycopene | CC          | Diet  | 3000 µg/d                             | NR       | Risk of breast cancer                  | 0.82 <sup>a</sup> | 0.74, 0.90 | 0.01*   |
| Hu et al.         | Lycopene | CC          | Diet  | 2000 µg/d                             | NR       | Risk of breast cancer                  | 0.87 <sup>a</sup> | 0.82, 0.93 | 0.01*   |
| Hu et al.         | Lycopene | CC          | Diet  | 10,000 µg/d vs 2000 µg/d              | 1-5 y    | Risk of breast cancer                  | 0.71 <sup>b</sup> | 0.56, 0.92 | 0.01*   |
| Hu et al.         | Lycopene | CC          | Diet  | 4000 µg/d                             | NR       | Risk of breast cancer                  | 0.76 <sup>a</sup> | 0.68, 0.86 | < 0.01* |
| Myung et al.      | Lycopene | CC          | Mixed | H vs L                                | 1-16 y   | Risk of cervical cancer                | 0.54 <sup>b</sup> | 0.39, 0.75 | NR*     |
| Panic et al.      | Lycopene | Cohort      | Diet  | H vs L                                | 1-9 y    | Risk of colon cancer                   | 0.94 <sup>a</sup> | 0.71, 1.24 | NR      |
| Panic et al.      | Lycopene | CC          | Diet  | H vs L                                | 1-3 y    | Risk of colon cancer                   | 0.95 <sup>b</sup> | 0.79, 1.15 | NR      |
| Panic et al.      | Lycopene | Cohort      | Diet  | H vs L                                | 1-9 y    | Risk of colorectal cancer              | 1.08 <sup>a</sup> | 0.95, 1.23 | NR      |
| Panic et al.      | Lycopene | CC          | Diet  | H vs L                                | 1-6 y    | Risk of colorectal cancer              | 0.92 <sup>b</sup> | 0.46, 1.83 | NR      |
| Zhou et al.       | Lycopene | CC          | Diet  | H vs L                                | NR       | Risk of gastric cancer                 | 0.94 <sup>b</sup> | 0.73, 1.21 | NR      |
| Zhou et al.       | Lycopene | Cohort      | Diet  | H vs L                                | NR       | Risk of gastric cancer                 | 0.80 <sup>b</sup> | 0.60, 1.07 | NR      |
| Leoncini et al.   | Lycopene | CC          | Diet  | H vs L                                | 1-8 y    | Risk of larynx cancer                  | 0.50 <sup>b</sup> | 0.28, 0.89 | NR*     |
| Gallicchio et al. | Lycopene | Cohort & CC | Diet  | 2035-18195 µg/d vs 132-<br>>4464 µg/d | 6-25 y   | Risk of lung cancer                    | 0.86 <sup>a</sup> | 0.77, 0.97 | NR*     |
| Gallicchio et al. | Lycopene | Cohort & CC | Serum | >4.5 µg/dL vs <2 µg/dL                | 8-12 y   | Risk of lung cancer                    | 0.71 <sup>a</sup> | 0.51, 0.98 | NR*     |
| Gallicchio et al. | Lycopene | Cohort & CC | Diet  | DR: Per 1000 µg/d                     | 6-14 y   | Risk of lung cancer                    | 0.97 <sup>a</sup> | 0.94, 1.00 | NR      |
| Chen et al.       | Lycopene | Cohort & CC | Diet  | DR: Per 4000 µg/d                     | NR       | Risk of non-Hodgkin lymphoma           | 0.96 <sup>a</sup> | 0.88, 1.06 | NR      |
| Chen et al.       | Lycopene | Cohort & CC | Diet  | H vs L                                | NR       | Risk of non-Hodgkin lymphoma           | 0.99 <sup>a</sup> | 0.88, 1.12 | NR      |
| Leoncini et al.   | Lycopene | CC          | Diet  | H vs L                                | 1-12 y   | Risk of oral cavity and pharynx cancer | 0.74 <sup>b</sup> | 0.56, 0.98 | NR*     |
| Li and Xu a       | Lycopene | Cohort & CC | Diet  | H vs L                                | 3 m-16 y | Risk of ovarian cancer                 | 0.96 <sup>b</sup> | 0.86, 1.08 | NR      |
| Huang et al.      | Lycopene | Cohort & CC | Diet  | H vs L                                | NR       | Risk of pancreatic cancer              | 0.84 <sup>b</sup> | 0.73, 0.97 | 0.02*   |
| Rowles et al.     | Lycopene | Cohort & CC | Diet  | H vs L                                | 3-13 y   | Risk of advanced prostate cancer       | 0.93 <sup>a</sup> | 0.82, 1.07 | 0.59    |
| Wang et al.       | Lycopene | CC          | Serum | H vs L                                | 3-13 y   | Risk of advanced prostate cancer       | 0.75 <sup>a</sup> | 0.44, 1.28 | NR      |

|                               |                    |             |            |           |            |                                          |                    |              |          |
|-------------------------------|--------------------|-------------|------------|-----------|------------|------------------------------------------|--------------------|--------------|----------|
| Rowles et al.                 | Lycopene           | Cohort & CC | Diet       | H vs L    | 2-24 y     | Risk of prostate cancer                  | 0.88 <sup>a</sup>  | 0.79, 0.99   | 0.02*    |
| Rowles et al.                 | Lycopene           | Cohort & CC | Serum      | H vs L    | 2-22 y     | Risk of prostate cancer                  | 0.88 <sup>a</sup>  | 0.79, 0.98   | 0.02*    |
| Ilic et al.                   | Lycopene           | RCT         | Supplement | 15-30 mg  | 4-6 m      | Prostate specific antigen levels (ng/mL) | -0.34 <sup>c</sup> | -2.01, 1.32  | 0.69     |
| Panic et al.                  | Lycopene           | Cohort      | Diet       | H vs L    | 1-9 y      | Risk of rectal cancer                    | 1.07 <sup>b</sup>  | 0.54, 2.11   | NR       |
| Panic et al.                  | Lycopene           | CC          | Diet       | H vs L    | 1-4 y      | Risk of rectal cancer                    | 0.82 <sup>b</sup>  | 0.57, 1.16   | NR       |
| <b>Cardiovascular disease</b> |                    |             |            |           |            |                                          |                    |              |          |
| Hajizadeh-Sharafabad et al.   | Beta-cryptoxanthin | RCT         | Mixed      | 6 mg      | 12 wk      | C-reactive protein (mg/L)                | -0.35 <sup>c</sup> | -0.54, -0.15 | < 0.001* |
| Hajizadeh-Sharafabad et al.   | Beta-cryptoxanthin | RCT         | Mixed      | 6 mg      | 12 wk      | IL-6 (pg/mL)                             | -0.55 <sup>c</sup> | -1.13, 0.03  | NR       |
| Song et al.                   | Lycopene           | Cohort & CC | Diet       | H vs L    | 7-11 y     | Risk of CHD                              | 0.87 <sup>a</sup>  | 0.76, 0.98   | NR*      |
| Song et al.                   | Lycopene           | Cohort & CC | Serum      | H vs L    | 11-13 y    | Risk of CHD                              | 0.79 <sup>a</sup>  | 0.52, 1.07   | NR       |
| Cheng et al.                  | Lycopene           | Cohort & CC | Mixed      | H vs L    | 2-12 y     | Risk of CVD                              | 0.86 <sup>d</sup>  | 0.77, 0.95   | 0.003*   |
| Hajizadeh-Sharafabad et al.   | Lycopene           | RCT         | Mixed      | 7-15 mg   | 4-16 wk    | C-reactive protein (mg/L)                | -1.23 <sup>c</sup> | -3.53, 1.07  | 0.30     |
| Tierney et al.                | Lycopene           | RCT         | Mixed      | 6-50 mg   | 2-14 wk    | Diastolic blood pressure (mmHg)          | 0.81 <sup>c</sup>  | -1.81, 3.44  | 0.54     |
| Ried et al.                   | Lycopene           | RCT         | Mixed      | 4-45.6 mg | 4 wk - 6 m | HDL cholesterol (mg/dL)                  | 0.80 <sup>c</sup>  | -2.33, 3.93  | 0.62     |
| Tierney et al.                | Lycopene           | RCT         | Mixed      | 2-50 mg   | 1 d - 6 m  | HDL cholesterol (mg/dL)                  | 1.58 <sup>c</sup>  | -2.00, 5.16  | 0.39     |
| Hajizadeh-Sharafabad et al.   | Lycopene           | RCT         | Mixed      | 7-20 mg   | 4-16wk     | IL-6 (pg/ml)                             | -1.08 <sup>c</sup> | -2.03, -0.12 | 0.03*    |
| Ried et al.                   | Lycopene           | RCT         | Mixed      | 4-45.6 mg | 3 wk - 6 m | LDL cholesterol (mg/dL)                  | -4.63 <sup>c</sup> | -9.24, -0.02 | 0.05     |
| Tierney et al.                | Lycopene           | RCT         | Mixed      | 2-50 mg   | 1 d - 6 m  | LDL cholesterol (mg/dL)                  | -2.02 <sup>c</sup> | -5.90, 1.86  | 0.31     |
| Cheng et al.                  | Lycopene           | Cohort & CC | Mixed      | H vs L    | 4 - 13 y   | Risk of stroke                           | 0.74 <sup>d</sup>  | 0.62, 0.89   | 0.001*   |
| Li & Xu b                     | Lycopene           | Cohort & CC | Mixed      | H vs L    | 6-13 y     | Risk of stroke                           | 0.807 <sup>a</sup> | 0.68, 0.96   | 0.01*    |
| Song et al.                   | Lycopene           | Cohort & CC | Serum      | H vs L    | 12-13 y    | Risk of stroke                           | 0.65 <sup>a</sup>  | 0.42, 0.87   | NR*      |
| Song et al.                   | Lycopene           | Cohort & CC | Diet       | H vs L    | 6-11 y     | Risk of stroke                           | 0.83 <sup>a</sup>  | 0.69, 0.96   | NR*      |
| Tierney et al.                | Lycopene           | RCT         | Mixed      | 6-50 mg   | 2-14 wk    | Systolic blood pressure (mmHg)           | -0.64 <sup>c</sup> | -3.23, 1.96  | 0.63     |



|                                      |                    |             |       |                    |               |                             |                    |               |          |
|--------------------------------------|--------------------|-------------|-------|--------------------|---------------|-----------------------------|--------------------|---------------|----------|
| Hajizadeh-Sharafabad et al.          | Lycopene           | RCT         | Mixed | 7-20 mg            | 2-16 wk       | TNF-alpha (pg/mL)           | -1.83 <sup>c</sup> | -4.10, 0.42   | NR       |
| Ried et al.                          | Lycopene           | RCT         | Mixed | 4-45.6 mg          | 15 d - 6 m    | Total cholesterol (mg/dL)   | -0.87 <sup>c</sup> | -4.12, 2.38   | 0.6      |
| Tierney et al.                       | Lycopene           | RCT         | Mixed | 2-50 mg            | 1 d - 6 m     | Total cholesterol (mg/dL)   | -0.32 <sup>c</sup> | -5.70, 5.06   | 0.91     |
| Ried et al.                          | Lycopene           | RCT         | Mixed | 4-45.6 mg          | 4 wk - 6 m    | Triglycerides (mg/dL)       | 3.21 <sup>c</sup>  | -10.5, 16.91  | 0.65     |
| Tierney et al.                       | Lycopene           | RCT         | Mixed | 2-50 mg            | 6 hours - 6 m | Triglycerides (mg/dL)       | 1.56 <sup>c</sup>  | -10.93, 14.05 | 0.81     |
| <b>Mortality</b>                     |                    |             |       |                    |               |                             |                    |               |          |
| Jayedi et al.                        | Beta-cryptoxanthin | Cohort      | Mixed | H vs L             | 2-26 y        | Risk of all-cause mortality | 0.73 <sup>a</sup>  | 0.58, 0.88    | NR*      |
| Jayedi et al.                        | Beta-cryptoxanthin | Cohort      | Serum | H vs L             | 2-26 y        | Risk of all-cause mortality | 0.88 <sup>a</sup>  | 0.79, 0.97    | NR*      |
| Jayedi et al.                        | Beta-cryptoxanthin | Cohort      | Serum | DR: Per 0.1 µmol/L | 2-26 y        | Risk of all-cause mortality | 0.94 <sup>a</sup>  | 0.89, 0.99    | NR*      |
| Jayedi et al.                        | Lycopene           | Cohort      | Mixed | H vs L             | 2-26 y        | Risk of all-cause mortality | 0.72 <sup>a</sup>  | 0.49, 0.95    | NR*      |
| Jayedi et al.                        | Lycopene           | Cohort      | Serum | H vs L             | 2-26 y        | Risk of all-cause mortality | 0.75 <sup>a</sup>  | 0.54, 0.97    | NR*      |
| Jayedi et al.                        | Lycopene           | Cohort      | Serum | DR: Per 0.1 µmol/L | 2-26 y        | Risk of all-cause mortality | 0.97 <sup>a</sup>  | 0.94, 1.00    | NR       |
| Cheng et al.                         | Lycopene           | Cohort & CC | Mixed | H vs L             | 8-18 y        | Risk of mortality           | 0.63 <sup>d</sup>  | 0.49, 0.81    | < 0.001* |
| <b>Obesity &amp; Type 2 diabetes</b> |                    |             |       |                    |               |                             |                    |               |          |
| Jiang et al.                         | Beta-cryptoxanthin | Cohort      | Serum | DR: Per 0.5 µmol/L | 8-10 y        | Risk of Type 2 diabetes     | 0.85 <sup>a</sup>  | 0.76, 0.94    | NR*      |
| Jiang et al.                         | Beta-cryptoxanthin | Cohort      | Serum | H vs L             | 8-10 y        | Risk of Type 2 diabetes     | 0.80 <sup>a</sup>  | 0.60, 1.06    | NR       |
| Jiang et al.                         | Beta-cryptoxanthin | Cohort      | Diet  | H vs L             | 10-23 y       | Risk of Type 2 diabetes     | 0.82 <sup>a</sup>  | 0.61, 1.10    | NR       |
| Jiang et al.                         | Beta-cryptoxanthin | Cohort      | Diet  | DR: Per 0.01 mg/d  | 10-23 y       | Risk of Type 2 diabetes     | 0.99 <sup>a</sup>  | 0.96, 1.03    | NR       |
| Jiang et al.                         | Lycopene           | Cohort      | Serum | DR: Per 0.5 µmol/L | 8-10 y        | Risk of Type 2 diabetes     | 0.83 <sup>a</sup>  | 0.74, 0.92    | NR*      |
| Jiang et al.                         | Lycopene           | Cohort      | Serum | H vs L             | 8-10 y        | Risk of Type 2 diabetes     | 0.85 <sup>a</sup>  | 0.76, 0.96    | NR*      |
| Jiang et al.                         | Lycopene           | Cohort      | Diet  | DR: Per 1 mg/d     | 7-23 y        | Risk of Type 2 diabetes     | 1.00 <sup>a</sup>  | 0.99, 1.01    | NR       |
| Jiang et al.                         | Lycopene           | Cohort      | Diet  | H vs L             | 7-23 y        | Risk of Type 2 diabetes     | 1.00 <sup>a</sup>  | 0.90, 1.11    | NR       |
| <b>Bone health</b>                   |                    |             |       |                    |               |                             |                    |               |          |
| Xu et al.                            | Beta-cryptoxanthin | Cohort      | Mixed | H vs L             | 9-17 y        | Risk of hip fracture        | 1.11 <sup>b</sup>  | 0.97, 1.28    | NR       |
| Kim et al.                           | Beta-cryptoxanthin | Cohort & CC | Diet  | H vs L             | NR            | Risk of hip fracture        | 0.72 <sup>b</sup>  | 0.60, 0.87    | <0.001*  |

|                                  |                    |             |       |        |        |                                                      |                    |             |      |
|----------------------------------|--------------------|-------------|-------|--------|--------|------------------------------------------------------|--------------------|-------------|------|
| Kim et al.                       | Beta-cryptoxanthin | Cohort & CC | Diet  | H vs L | NR     | Osteoporosis-related outcome                         | 0.80 <sup>b</sup>  | 0.65, 1.00  | 0.05 |
| Xu et al.                        | Lycopene           | Cohort      | Mixed | H vs L | 9-17 y | Risk of hip fracture                                 | 0.84 <sup>b</sup>  | 0.69, 1.01  | NR   |
| <b>Eye health</b>                |                    |             |       |        |        |                                                      |                    |             |      |
| Jiang et al.                     | Beta-cryptoxanthin | Cohort      | Diet  | H vs L | 5-15 y | Cataract incidence                                   | 0.95 <sup>a</sup>  | 0.87, 1.05  | 0.33 |
| Chong et al.                     | Beta-cryptoxanthin | Cohort      | Mixed | H vs L | 5-18 y | Incidence of early aged related macular degeneration | 1.01 <sup>b</sup>  | 0.85, 1.22  | 0.88 |
| Chong et al.                     | Lycopene           | Cohort      | Mixed | H vs L | 5-18 y | Incidence of early aged related macular degeneration | 1.05 <sup>b</sup>  | 0.88, 1.25  | 0.61 |
| <b>Neurodegenerative disease</b> |                    |             |       |        |        |                                                      |                    |             |      |
| Takeda et al.                    | Beta-cryptoxanthin | Cohort & CC | Diet  | H vs L | NR     | Risk of Parkinson's disease                          | 0.96 <sup>b</sup>  | 0.66, 1.40  | 0.84 |
| Takeda et al.                    | Lycopene           | Cohort & CC | Diet  | H vs L | NR     | Risk of Parkinson's disease                          | 1.03 <sup>b</sup>  | 0.64, 1.65  | 0.9  |
| <b>Pregnancy health</b>          |                    |             |       |        |        |                                                      |                    |             |      |
| Cohen et al.                     | Lycopene           | CC          | Mixed | H vs L | 9 m    | Preeclampsia                                         | -1.05 <sup>e</sup> | -2.09, 0.00 | 0.05 |

CC = case control; CVD = cardiovascular disease; CHD = coronary heart disease; d = days; DR = dose response; H vs L = highest dose (intervention) vs lowest dose (control); IL-6 = interleukin-6; NR = not reported; RCT = randomised controlled trial; TNF-alpha = tumor necrosis factor alpha; Total-C = total cholesterol; wk = weeks; y = years.

<sup>a</sup> Risk Ratio or relative risk; <sup>b</sup> Odds Ratio; <sup>c</sup> Mean difference; <sup>d</sup> Hazard Ratio; <sup>e</sup> Standardized mean difference.

\* Significant difference favoring the intervention.

**Table S4.** Meta-analysis results of included SLRs for the health effects of orange pigments found in fruit and vegetables.

| AUTHOR                 | PIGMENT       | DESIGN      | TYPE       | DOSE                     | DURATION | HEALTH OUTCOME             | EFFECT SIZE       | 95% CI     | P-VALUE |
|------------------------|---------------|-------------|------------|--------------------------|----------|----------------------------|-------------------|------------|---------|
| Cancer                 |               |             |            |                          |          |                            |                   |            |         |
| Wu et al.              | Beta-carotene | Cohort & CC | Serum      | DR: Graphic only         | NR       | Risk of bladder cancer     | 0.73 <sup>b</sup> | 0.57, 0.94 | NR*     |
| Wu et al.              | Beta-carotene | Cohort & CC | Serum      | H vs L                   | NR       | Risk of bladder cancer     | 0.67 <sup>b</sup> | 0.28, 1.62 | NR      |
| Wu et al.              | Beta-carotene | Cohort & CC | Supplement | 600-1991 µg/d            | NR       | Risk of bladder cancer     | 0.94 <sup>b</sup> | 0.70, 1.26 | NR      |
| Wu et al.              | Beta-carotene | Cohort & CC | Diet       | H vs L                   | NR       | Risk of bladder cancer     | 0.95 <sup>b</sup> | 0.88, 1.03 | NR      |
| Hu et al.              | Beta-carotene | Cohort      | Diet       | DR: 5000 µg/d            | NR       | Risk of breast cancer      | 0.93 <sup>b</sup> | 0.89, 0.97 | <0.01*  |
| Hu et al.              | Beta-carotene | Cohort      | Diet       | DR: 3000 µg/d            | NR       | Risk of breast cancer      | 0.96 <sup>b</sup> | 0.93, 0.98 | <0.01*  |
| Hu et al.              | Beta-carotene | Cohort      | Diet       | DR: 2000 µg/d            | NR       | Risk of breast cancer      | 0.97 <sup>b</sup> | 0.96, 0.99 | <0.01*  |
| Hu et al.              | Beta-carotene | Cohort      | Mixed      | 7000 µg/d vs 1500 µg/d   | 4-14 y   | Risk of breast cancer      | 0.95 <sup>b</sup> | 0.90, 1.01 | 0.08    |
| Hu et al.              | Beta-carotene | CC          | Mixed      | DR: 5000 µg/d            | NR       | Risk of breast cancer      | 0.76 <sup>b</sup> | 0.70, 0.82 | 0.01*   |
| Hu et al.              | Beta-carotene | CC          | Mixed      | DR: 3000 µg/d            | NR       | Risk of breast cancer      | 0.85 <sup>b</sup> | 0.81, 0.88 | 0.01*   |
| Hu et al.              | Beta-carotene | CC          | Mixed      | DR: 2000 µg/d            | NR       | Risk of breast cancer      | 0.89 <sup>b</sup> | 0.87, 0.92 | 0.01*   |
| Hu et al.              | Beta-carotene | CC          | Diet       | 7000 µg/d vs 1500 µg/d   | 1-5 y    | Risk of breast cancer      | 0.75 <sup>a</sup> | 0.67, 0.85 | <0.01*  |
| Druesne-Pecollo et al. | Beta-carotene | RCT         | Supplement | 20-25 mg/d               | 2-13 y   | Risk of cancer (any type)  | 1.02 <sup>b</sup> | 0.97, 1.07 | 0.45    |
| Myung et al.           | Beta-carotene | CC          | Mixed      | H vs L                   | 1-16 y   | Risk of cervical cancer    | 0.68 <sup>a</sup> | 0.55, 0.84 | NR*     |
| Panic et al.           | Beta-carotene | Cohort      | Diet       | H vs L                   | 1-9 y    | Risk of colon cancer       | 0.88 <sup>b</sup> | 0.72, 1.07 | NR      |
| Panic et al.           | Beta-carotene | CC          | Diet       | H vs L                   | 3-8 y    | Risk of colon cancer       | 0.78 <sup>a</sup> | 0.50, 1.24 | NR      |
| Druesne-Pecollo et al. | Beta-carotene | RCT         | Supplement | 20-25 mg/d               | 2-13 y   | Risk of colorectal cancer  | 0.99 <sup>b</sup> | 0.83, 1.18 | 0.89    |
| Panic et al.           | Beta-carotene | Cohort      | Diet       | H vs L                   | 1-9 y    | Risk of colorectal cancer  | 0.98 <sup>b</sup> | 0.87, 1.11 | NR      |
| Panic et al.           | Beta-carotene | CC          | Diet       | H vs L                   | 2-8 y    | Risk of colorectal cancer  | 0.64 <sup>a</sup> | 0.38, 1.08 | NR      |
| Xu et al.              | Beta-carotene | CC          | Diet       | H vs L                   | 4 y      | Risk of colorectal cancer  | 0.47 <sup>b</sup> | 0.24, 0.91 | NR*     |
| Bandera et al.         | Beta-carotene | CC          | Diet       | DR: Per 1000 µg/1000kcal | NR       | Risk of endometrial cancer | 0.88 <sup>a</sup> | 0.79, 0.98 | <0.001* |
| Druesne-Pecollo et al. | Beta-carotene | RCT         | Supplement | 20-25 mg/d               | 2-13 y   | Risk of gastric cancer     | 1.16 <sup>b</sup> | 0.78, 1.73 | 0.47    |
| Zhou et al.            | Beta-carotene | Cohort      | Diet       | H vs L                   | NR       | Risk of gastric cancer     | 0.74 <sup>a</sup> | 0.61, 0.91 | NR*     |

|                        |               |             |            |                                         |        |                                              |                   |            |        |
|------------------------|---------------|-------------|------------|-----------------------------------------|--------|----------------------------------------------|-------------------|------------|--------|
| Zhou et al.            | Beta-carotene | CC          | Diet       | H vs L                                  | NR     | Risk of gastric cancer                       | 0.52 <sup>a</sup> | 0.46, 0.59 | NR*    |
| Leoncini et al.        | Beta-carotene | CC          | Diet       | H vs L                                  | 3-8 y  | Risk of larynx cancer                        | 0.43 <sup>a</sup> | 0.24, 0.77 | NR*    |
| Druesne-Pecollo et al. | Beta-carotene | RCT         | Supplement | 20-25 mg/d                              | 2-13 y | Risk of lung cancer                          | 1.09 <sup>b</sup> | 0.94, 1.26 | 0.24   |
| Gallicchio et al.      | Beta-carotene | Cohort & CC | Serum      | DR: Per 0.1 µmol/L                      | 6-14 y | Risk of lung cancer                          | 0.95 <sup>b</sup> | 0.87, 1.03 | NR     |
| Gallicchio et al.      | Beta-carotene | Cohort & CC | Diet       | DR: Per 500 µg/d                        | 6-24 y | Risk of lung cancer                          | 0.99 <sup>b</sup> | 0.98, 1.00 | NR     |
| Gallicchio et al.      | Beta-carotene | RCT         | Supplement | 20-50 mg/d                              | 2-13 y | Risk of lung cancer or lung cancer mortality | 1.10 <sup>b</sup> | 0.89, 1.36 | NR     |
| Gallicchio et al.      | Beta-carotene | Cohort & CC | Serum      | >16->120 µg/dL vs <7-<30 µg/dL          | 6-14 y | Risk of lung cancer or lung cancer mortality | 0.84 <sup>b</sup> | 0.66, 1.07 | NR     |
| Gallicchio et al.      | Beta-carotene | Cohort & CC | Diet       | 2473 to 8950 µg/d vs <977 to <3152 µg/d | 6-25 y | Risk of lung cancer or lung cancer mortality | 0.92 <sup>b</sup> | 0.83, 1.01 | NR     |
| Zhang et al.           | Beta-carotene | Cohort & CC | Mixed      | H vs L                                  | NR     | Risk of melanoma                             | 0.87 <sup>a</sup> | 0.62, 1.20 | NR     |
| Chen et al.            | Beta-carotene | Cohort & CC | Diet       | H vs L                                  | NR     | Risk of non-Hodgkin lymphoma                 | 0.80 <sup>b</sup> | 0.68, 0.94 | NR*    |
| Leoncini et al.        | Beta-carotene | CC          | Diet       | H vs L                                  | 5-8 y  | Risk of oral cavity and pharynx cancer       | 0.67 <sup>a</sup> | 0.29, 1.53 | NR     |
| Leoncini et al.        | Beta-carotene | CC          | Diet       | H vs L                                  | 1-3 y  | Risk of oral cavity cancer                   | 0.54 <sup>a</sup> | 0.37, 0.80 | NR*    |
| Huncharket et al.      | Beta-carotene | Cohort & CC | Diet       | H vs L                                  | NR     | Risk of ovarian cancer                       | 0.84 <sup>b</sup> | 0.75, 0.94 | NR*    |
| Druesne-Pecollo et al. | Beta-carotene | RCT         | Supplement | 20-25 mg/d                              | 2-13 y | Risk of pancreatic cancer                    | 0.94 <sup>b</sup> | 0.41, 2.14 | 0.89   |
| Huang et al.           | Beta-carotene | Cohort & CC | Diet       | H vs L                                  | NR     | Risk of pancreatic cancer                    | 0.78 <sup>a</sup> | 0.66, 0.92 | 0.003* |
| Druesne-Pecollo et al. | Beta-carotene | RCT         | Supplement | 20-25 mg/d                              | 2-13 y | Risk of prostate cancer                      | 1.02 <sup>b</sup> | 0.93, 1.12 | 0.71   |
| Wang et al.            | Beta-carotene | CC          | Serum      | H vs L                                  | 3-20 y | Risk of prostate cancer                      | 0.96 <sup>b</sup> | 0.81, 1.14 | 0.65   |
| Wang et al.            | Beta-carotene | Cohort & CC | Diet       | H vs L                                  | 6-20 y | Risk of prostate cancer                      | 0.90 <sup>b</sup> | 0.81, 1.01 | 0.07   |
| Jiang et al.           | Beta-carotene | RCT         | Mixed      | 20-50 mg                                | 4-12 y | Incidence of prostate cancer                 | 0.97 <sup>b</sup> | 0.90, 1.05 | 0.51   |
| Panic et al.           | Beta-carotene | CC          | Diet       | H vs L                                  | 4-8 y  | Risk of rectal cancer                        | 1.13 <sup>a</sup> | 0.85, 1.51 | NR     |
| Panic et al.           | Beta-carotene | Cohort      | Diet       | H vs L                                  | 1-9 y  | Risk of rectal cancer                        | 1.05 <sup>a</sup> | 0.80, 1.37 | NR     |

#### Cardiovascular disease

|              |               |     |            |    |    |             |                   |            |    |
|--------------|---------------|-----|------------|----|----|-------------|-------------------|------------|----|
| Mente et al. | Beta-carotene | RCT | Supplement | NR | NR | Risk of CHD | 1.01 <sup>b</sup> | 0.92, 1.09 | NR |
|--------------|---------------|-----|------------|----|----|-------------|-------------------|------------|----|

|                             |               |             |            |                    |        |                                            |                    |             |         |
|-----------------------------|---------------|-------------|------------|--------------------|--------|--------------------------------------------|--------------------|-------------|---------|
| Mente et al.                | Beta-carotene | Cohort      | Diet       | H vs L             | NR     | Risk of CHD                                | 0.73 <sup>b</sup>  | 0.65, 0.82  | NR*     |
| Ye et al.                   | Beta-carotene | Cohort      | Mixed      | H vs L             | 4-24 y | Risk of CHD                                | 0.78 <sup>b</sup>  | 0.53, 1.04  | NR      |
| Ye et al.                   | Beta-carotene | Cohort      | Mixed      | DR: Per 1 mg/d     | 4-24 y | Risk of CHD                                | 1.00 <sup>b</sup>  | 0.88, 1.14  | NR      |
| Seyedrezazadeh et al.       | Beta-carotene | CC          | Diet       | NR                 | NR     | Risk of COPD                               | 0.99 <sup>b</sup>  | 0.99, 1.00  | 0.9     |
| Fortmann et al.             | Beta-carotene | RCT         | Supplement | 50 mg              | 4-12 y | Risk of CVD                                | 1.01 <sup>b</sup>  | 0.93, 1.09  | NR      |
| Hajizadeh-Sharafabad et al. | Beta-carotene | RCT         | Mixed      | 10-15 mg           | 8 wk   | C-reactive protein (units NR)              | -2.31 <sup>c</sup> | -5.67, 1.04 | NR      |
| Vivekananthan et al.        | Beta-carotene | RCT         | Supplement | 80-200 mg          | 2-12 y | Risk of all-cause cerebrovascular accident | 1.00 <sup>a</sup>  | 0.91, 1.09  | 0.92    |
| Mortality                   |               |             |            |                    |        |                                            |                    |             |         |
| Fortmann et al.             | Beta-carotene | RCT         | Supplement | 50 mg              | 4-16 y | Risk of all-cause mortality                | 1.05 <sup>b</sup>  | 1.02, 1.08  | NR**    |
| Vivekananthan et al.        | Beta-carotene | RCT         | Supplement | 60-200 mg          | 2-12 y | Risk of all-cause mortality                | 1.07 <sup>a</sup>  | 1.02, 1.11  | 0.003** |
| Jayedi et al.               | Beta-carotene | Cohort      | Serum      | H vs L             | 2-26 y | Risk of all-cause mortality                | 0.63 <sup>b</sup>  | 0.57, 0.70  | NR*     |
| Jayedi et al.               | Beta-carotene | Cohort      | Mixed      | H vs L             | 2-26 y | Risk of all-cause mortality                | 0.82 <sup>b</sup>  | 0.77, 0.86  | NR*     |
| Jayedi et al.               | Beta-carotene | Cohort      | Mixed      | DR: Per 1 mg/d     | 2-26 y | Risk of all-cause mortality                | 0.95 <sup>b</sup>  | 0.92, 0.99  | NR*     |
| Jayedi et al.               | Beta-carotene | Cohort      | Serum      | DR: Per 0.1 µmol/L | 2-26 y | Risk of all-cause mortality                | 0.96 <sup>b</sup>  | 0.94, 0.98  | NR*     |
| Jayedi et al.               | Beta-carotene | Cohort & CC | Serum      | H vs L             | 4-26 y | Risk of CVD mortality                      | 0.68 <sup>b</sup>  | 0.52, 0.83  | NR*     |
| Jayedi et al.               | Beta-carotene | Cohort & CC | Mixed      | H vs L             | 4-14 y | Risk of CVD mortality                      | 0.89 <sup>b</sup>  | 0.73, 1.05  | NR      |
| Jayedi et al.               | Beta-carotene | Cohort & CC | Mixed      | DR: Per 0.1 µmol/L | 4-14 y | Risk of CVD mortality                      | 0.93 <sup>b</sup>  | 0.84, 1.01  | NR      |
| Vivekananthan et al.        | Beta-carotene | RCT         | Supplement | 60-200 mg          | 4-12 y | Risk of CVD mortality                      | 1.10 <sup>a</sup>  | 1.03, 1.17  | 0.003** |
| Obesity & Type 2 diabetes   |               |             |            |                    |        |                                            |                    |             |         |
| Jiang et al.                | Beta-carotene | Cohort      | Serum      | H vs L             | 7-20 y | Risk of Type 2 diabetes                    | 0.60 <sup>b</sup>  | 0.46, 0.78  | NR*     |
| Jiang et al.                | Beta-carotene | Cohort      | Diet       | H vs L             | 7-23 y | Risk of Type 2 diabetes                    | 0.78 <sup>b</sup>  | 0.70, 0.87  | NR*     |
| Jiang et al.                | Beta-carotene | Cohort      | Serum      | DR: Per 0.5 µmol/L | 7-10 y | Risk of Type 2 diabetes                    | 0.65 <sup>b</sup>  | 0.48, 0.89  | NR*     |
| Jiang et al.                | Beta-carotene | Cohort      | Diet       | DR: Per 1 mg/d     | 7-23 y | Risk of Type 2 diabetes                    | 0.95 <sup>b</sup>  | 0.90, 1.01  | NR      |
| Bone health                 |               |             |            |                    |        |                                            |                    |             |         |
| Charkos et al.              | Beta-carotene | Cohort & CC | Diet       | H vs L             | NR     | Risk of total fracture                     | 0.63 <sup>b</sup>  | 0.52, 0.77  | <0.001* |

|                           |               |             |       |        |        |                                                      |                    |              |        |
|---------------------------|---------------|-------------|-------|--------|--------|------------------------------------------------------|--------------------|--------------|--------|
| Xu et al.                 | Beta-carotene | Cohort & CC | Mixed | H vs L | NR     | Risk of hip fracture                                 | 0.72 <sup>a</sup>  | 0.54, 0.95   | NR*    |
| Zhang et al.              | Beta-carotene | Cohort & CC | Mixed | H vs L | NR     | Risk of total fracture                               | 1.07 <sup>b</sup>  | 0.97, 1.17   | NR     |
| Eye health                |               |             |       |        |        |                                                      |                    |              |        |
| Chong et al.              | Beta-carotene | Cohort      | Mixed | H vs L | 5-18 y | Incidence of early aged related macular degeneration | 1.04 <sup>a</sup>  | 0.86, 1.25   | 0.71   |
| Jiang et al.              | Beta-carotene | Cohort      | Diet  | H vs L | 5-15 y | Cataract incidence                                   | 0.90 <sup>b</sup>  | 0.83, 0.99   | 0.023* |
| Neurodegenerative disease |               |             |       |        |        |                                                      |                    |              |        |
| Li et al.                 | Beta-carotene | CC          | Diet  | H vs L | NR     | Risk of Alzheimer's disease                          | 0.88 <sup>b</sup>  | 0.73, 1.03   | NR     |
| Takeda et al.             | Beta-carotene | Cohort & CC | Diet  | H vs L | NR     | Risk of Parkinson's disease                          | 0.91 <sup>a</sup>  | 0.70, 1.20   | 0.52   |
| Pregnancy health          |               |             |       |        |        |                                                      |                    |              |        |
| Cohen et al.              | Beta-carotene | Cohort & CC | Mixed | H vs L | 9 m    | Preeclampsia                                         | -0.40 <sup>d</sup> | -0.72, -0.08 | 0.01*  |

CC = case control; CVD = cardiovascular disease; CHD = coronary heart disease; COPD = chronic obstructive pulmonary disease; DR = dose response; H vs L = highest dose (intervention) vs lowest dose (control); IHD = ischemic heart disease; m = months; NR = not reported; RCT = randomised controlled trial; wk = weeks; y = years

<sup>a</sup> Odds ratio; <sup>b</sup> Risk ratio or relative risk; <sup>c</sup> Mean difference; <sup>d</sup> Standardized mean difference.

\* Significant difference favoring the intervention

\*\* Significant difference favoring control

**Table S5.** Meta-analysis results of included SLRs for the health effects of yellow pigments found in fruit and vegetables.

| AUTHOR            | PIGMENT        | DESIGN      | TYPE  | DOSE                                   | DURATION | HEALTH OUTCOME               | EFFECT SIZE       | 95% CI     | P-VALUE |
|-------------------|----------------|-------------|-------|----------------------------------------|----------|------------------------------|-------------------|------------|---------|
| Cancer            |                |             |       |                                        |          |                              |                   |            |         |
| Wu et al.         | Alpha-carotene | Cohort & CC | Serum | H vs L                                 | NR       | Risk of bladder cancer       | 0.52 <sup>a</sup> | 0.21, 1.27 | NR      |
| Wu et al.         | Alpha-carotene | Cohort & CC | Diet  | H vs L                                 | NR       | Risk of bladder cancer       | 0.94 <sup>a</sup> | 0.80, 1.09 | NR      |
| Wu et al.         | Alpha-carotene | Cohort & CC | Serum | DR: Graphic only                       | NR       | Risk of bladder cancer       | 0.24 <sup>a</sup> | 0.08, 0.67 | NR*     |
| Hu et al.         | Alpha-carotene | Cohort      | Diet  | DR: 1500 µg/d                          | NR       | Risk of breast cancer        | 0.91 <sup>a</sup> | 0.87, 0.96 | 0.01*   |
| Hu et al.         | Alpha-carotene | Cohort      | Diet  | DR: 1000 µg/d                          | NR       | Risk of breast cancer        | 0.94 <sup>a</sup> | 0.91, 0.98 | 0.01*   |
| Hu et al.         | Alpha-carotene | Cohort      | Diet  | DR: 500 µg/d                           | NR       | Risk of breast cancer        | 0.97 <sup>a</sup> | 0.95, 0.99 | 0.01*   |
| Hu et al.         | Alpha-carotene | Cohort      | Diet  | 2000 µg/d                              | 8-14 y   | Risk of breast cancer        | 0.91 <sup>a</sup> | 0.85, 0.98 | 0.01*   |
| Hu et al.         | Alpha-carotene | CC          | Diet  | DR: 1500 µg/d                          | NR       | Risk of breast cancer        | 0.75 <sup>a</sup> | 0.62, 0.90 | 0.01*   |
| Hu et al.         | Alpha-carotene | CC          | Diet  | DR: 1000 µg/d                          | NR       | Risk of breast cancer        | 0.82 <sup>a</sup> | 0.73, 0.93 | 0.01*   |
| Hu et al.         | Alpha-carotene | CC          | Diet  | DR: 500 µg/d                           | NR       | Risk of breast cancer        | 0.91 <sup>a</sup> | 0.85, 0.97 | 0.01*   |
| Hu et al.         | Alpha-carotene | CC          | Diet  | 2000 µg/d                              | 1-2 y    | Risk of breast cancer        | 0.82 <sup>b</sup> | 0.70, 0.97 | 0.02*   |
| Leoncini et al.   | Alpha-carotene | CC          | Diet  | H vs L                                 | 1-8 y    | Risk of cancer of the larynx | 0.46 <sup>b</sup> | 0.20, 1.06 | NR      |
| Panic et al.      | Alpha-carotene | Cohort      | Diet  | H vs L                                 | 1-9 y    | Risk of colon cancer         | 1.00 <sup>a</sup> | 0.84, 1.18 | NR      |
| Panic et al.      | Alpha-carotene | Cohort      | Diet  | H vs L                                 | 1-9 y    | Risk of colorectal cancer    | 1.05 <sup>a</sup> | 0.92, 1.21 | NR      |
| Panic et al.      | Alpha-carotene | CC          | Diet  | H vs L                                 | 3-5 y    | Risk of colorectal cancer    | 0.58 <sup>b</sup> | 0.33, 1.03 | NR      |
| Zhou et al.       | Alpha-carotene | Cohort      | Diet  | H vs L                                 | NR       | Risk of gastric cancer       | 0.79 <sup>b</sup> | 0.59, 1.07 | NR      |
| Zhou et al.       | Alpha-carotene | CC          | Diet  | H vs L                                 | NR       | Risk of gastric cancer       | 0.58 <sup>b</sup> | 0.44, 0.76 | NR*     |
| Chen et al.       | Alpha-carotene | Cohort & CC | Diet  | H vs L                                 | NR       | Risk of non-Hodgkin lymphoma | 0.87 <sup>a</sup> | 0.78, 0.97 | NR*     |
| Chen et al.       | Alpha-carotene | Cohort & CC | Diet  | DR: Per 1000 µg/d                      | NR       | Risk of non-Hodgkin lymphoma | 0.87 <sup>a</sup> | 0.78, 0.97 | NR*     |
| Gallicchio et al. | Alpha-carotene | Cohort & CC | Serum | DR: Per 0.05 µmol/L                    | 6-10 y   | Risk of lung cancer          | 0.84 <sup>a</sup> | 0.44, 0.59 | NR      |
| Gallicchio et al. | Alpha-carotene | Cohort & CC | Diet  | >881 to 1810 µg/d vs <180 to <558 µg/d | 6-25 y   | Risk of lung cancer          | 0.89 <sup>a</sup> | 0.79, 1.00 | NR      |
| Gallicchio et al. | Alpha-carotene | Cohort & CC | Diet  | DR: Per 200 µg/d                       | 6-14 y   | Risk of lung cancer          | 0.99 <sup>a</sup> | 0.97, 1.01 | NR      |

|                   |                     |             |       |                                  |         |                                              |                   |            |        |
|-------------------|---------------------|-------------|-------|----------------------------------|---------|----------------------------------------------|-------------------|------------|--------|
| Gallicchio et al. | Alpha-carotene      | Cohort & CC | Serum | >1 to >5 µg/dL vs <1 to <2 µg/dL | 6-12 y  | Risk of lung cancer or lung cancer mortality | 0.89 <sup>a</sup> | 0.59, 1.33 | NR     |
| Leoncini et al.   | Alpha-carotene      | CC          | Diet  | H vs L                           | 1-12 y  | Risk of oral cavity and pharynx cancer       | 0.57 <sup>b</sup> | 0.41, 0.79 | NR*    |
| Wang et al.       | Alpha-carotene      | CC          | Serum | H vs L                           | 8-13 y  | Risk of advanced prostate cancer             | 1.07 <sup>a</sup> | 0.75, 1.52 | NR     |
| Huang et al.      | Alpha-carotene      | Cohort & CC | Diet  | H vs L                           | NR      | Risk of pancreatic cancer                    | 0.88 <sup>b</sup> | 0.66, 1.18 | 0.41   |
| Wang et al.       | Alpha-carotene      | Cohort & CC | Diet  | H vs L                           | 6-20 y  | Risk of prostate cancer                      | 0.87 <sup>a</sup> | 0.76, 0.99 | 0.04*  |
| Wang et al.       | Alpha-carotene      | CC          | Serum | H vs L                           | 4-20 y  | Risk of prostate cancer                      | 0.91 <sup>a</sup> | 0.72, 1.15 | 0.44   |
| Panic et al.      | Alpha-carotene      | Cohort      | Diet  | H vs L                           | 1-9 y   | Risk of rectal cancer                        | 1.02 <sup>b</sup> | 0.77, 1.35 | NR     |
| Zhou et al.       | Lutein              | CC          | Diet  | H vs L                           | NR      | Risk of gastric cancer                       | 0.89 <sup>b</sup> | 0.68, 1.15 | NR     |
| Gallicchio et al. | Lutein              | Cohort      | Diet  | 4041-3701 µg/d vs 1413-1736 µg/d | 10-12 y | Risk of lung cancer                          | 0.90 <sup>a</sup> | 0.74, 1.10 | NR     |
| Gallicchio et al. | Lutein              | Cohort & CC | Diet  | DR: Per 500 µg/d                 | 10-12 y | Risk of lung cancer                          | 0.98 <sup>a</sup> | 0.97, 1.10 | NR     |
| Wu et al.         | Lutein & Zeaxanthin | Cohort & CC | Serum | H vs L                           | NR      | Risk of bladder cancer                       | 0.53 <sup>a</sup> | 0.33, 0.84 | NR*    |
| Wu et al.         | Lutein & Zeaxanthin | Cohort & CC | Diet  | H vs L                           | NR      | Risk of bladder cancer                       | 0.91 <sup>a</sup> | 0.76, 1.10 | NR     |
| Wu et al.         | Lutein & Zeaxanthin | Cohort & CC | Serum | DR: Graphic only                 | NR      | Risk of bladder cancer                       | 0.44 <sup>a</sup> | 0.28, 0.67 | NR*    |
| Hu et al.         | Lutein & Zeaxanthin | Cohort      | Diet  | 5000 µg/d vs 1000 µg/d           | 2-14 y  | Risk of breast cancer                        | 0.94 <sup>a</sup> | 0.87, 1.02 | 0.13   |
| Hu et al.         | Lutein & Zeaxanthin | Cohort      | Diet  | 2000 µg/d vs 300 µg/d            | NR      | Risk of breast cancer                        | 1.00 <sup>a</sup> | 0.94, 1.08 | 0.91   |
| Hu et al.         | Lutein & Zeaxanthin | Cohort      | Diet  | DR: 3000 µg/d                    | NR      | Risk of breast cancer                        | 1.00 <sup>a</sup> | 0.91, 1.12 | 0.91   |
| Hu et al.         | Lutein & Zeaxanthin | Cohort      | Diet  | DR: 4000 µg/d                    | NR      | Risk of breast cancer                        | 1.01 <sup>a</sup> | 0.82, 1.24 | 0.96   |
| Hu et al.         | Lutein & Zeaxanthin | CC          | Diet  | 2000 µg/d vs 300 µg/d            | NR      | Risk of breast cancer                        | 0.88 <sup>a</sup> | 0.84, 0.92 | 0.01*  |
| Hu et al.         | Lutein & Zeaxanthin | CC          | Diet  | DR: 3000 µg/d                    | NR      | Risk of breast cancer                        | 0.83 <sup>a</sup> | 0.77, 0.89 | <0.01* |
| Hu et al.         | Lutein & Zeaxanthin | CC          | Diet  | 5000 µg/d vs 1000 µg/d           | 1-5 y   | Risk of breast cancer                        | 0.79 <sup>b</sup> | 0.66, 0.94 | 0.01*  |
| Hu et al.         | Lutein & Zeaxanthin | CC          | Diet  | DR: 4000 µg/d                    | NR      | Risk of breast cancer                        | 0.88 <sup>a</sup> | 0.75, 1.05 | 0.15   |
| Panic et al.      | Lutein & Zeaxanthin | Cohort      | Diet  | H vs L                           | 1-9 y   | Risk of colon cancer                         | 0.92 <sup>a</sup> | 0.77, 1.09 | NR     |
| Panic et al.      | Lutein & Zeaxanthin | CC          | Diet  | H vs L                           | 3-4 y   | Risk of colon cancer                         | 0.89 <sup>b</sup> | 0.77, 1.03 | NR     |
| Panic et al.      | Lutein & Zeaxanthin | Cohort      | Diet  | H vs L                           | 1-9 y   | Risk of colorectal cancer                    | 1.05 <sup>a</sup> | 0.91, 1.20 | NR     |
| Panic et al.      | Lutein & Zeaxanthin | CC          | Diet  | H vs L                           | 3-6 y   | Risk of colorectal cancer                    | 0.78 <sup>b</sup> | 0.56, 1.09 | NR     |



|                             |                     |             |       |                                         |         |                                              |                    |              |         |
|-----------------------------|---------------------|-------------|-------|-----------------------------------------|---------|----------------------------------------------|--------------------|--------------|---------|
| Zhou et al.                 | Lutein & Zeaxanthin | Cohort      | Diet  | H vs L                                  | NR      | Risk of gastric cancer                       | 0.95 <sup>b</sup>  | 0.77, 1.18   | NR      |
| Leoncini et al.             | Lutein & Zeaxanthin | CC          | Diet  | H vs L                                  | 1-8 y   | Risk of larynx cancer                        | 0.60 <sup>b</sup>  | 0.27, 1.32   | NR      |
| Gallicchio et al.           | Lutein & Zeaxanthin | Cohort      | Diet  | >1815 to 3857 µg/d vs <775 to 1388 µg/d | 6-25 y  | Risk of lung cancer                          | 0.89 <sup>a</sup>  | 0.79, 1.10   | NR      |
| Gallicchio et al.           | Lutein & Zeaxanthin | Cohort & CC | Diet  | DR: Per 500 µg/d                        | 6-14 y  | Risk of lung cancer                          | 0.97 <sup>a</sup>  | 0.84, 1.12   | NR      |
| Gallicchio et al.           | Lutein & Zeaxanthin | Cohort & CC | Serum | DR: Per 0.1 µmol/L                      | 6-10 y  | Risk of lung cancer                          | 0.98 <sup>a</sup>  | 0.90, 1.06   | NR      |
| Gallicchio et al.           | Lutein & Zeaxanthin | Cohort & CC | Serum | >40 to >60 µg/dL vs <24 to <44 µg/dL    | 6-12 y  | Risk of lung cancer or lung cancer mortality | 0.95 <sup>a</sup>  | 0.67, 1.36   | NR      |
| Chen et al.                 | Lutein & Zeaxanthin | Cohort & CC | Diet  | H vs L                                  | NR      | Risk of non-Hodgkin lymphoma                 | 0.82 <sup>a</sup>  | 0.69, 0.97   | NR*     |
| Leoncini et al.             | Lutein & Zeaxanthin | CC          | Diet  | H vs L                                  | 1-12 y  | Risk of oral cavity and pharynx cancer       | 0.51 <sup>b</sup>  | 0.22, 1.18   | NR      |
| Huang et al.                | Lutein & Zeaxanthin | Cohort & CC | Diet  | H vs L                                  | NR      | Risk of pancreatic cancer                    | 0.80 <sup>b</sup>  | 0.61, 1.05   | 0.10    |
| Panic et al.                | Lutein & Zeaxanthin | Cohort      | Diet  | H vs L                                  | 1-9 y   | Risk of rectal cancer                        | 1.37 <sup>b</sup>  | 0.78, 2.39   | NR      |
| Cardiovascular disease      |                     |             |       |                                         |         |                                              |                    |              |         |
| Leermakers et al.           | Lutein              | Cohort & CC | Mixed | H vs L                                  | 6-13 y  | Risk of stroke                               | 0.82 <sup>a</sup>  | 0.72, 0.93   | NR*     |
| Hajizadeh-Sharafabad et al. | Lutein & Zeaxanthin | RCT         | Mixed | 8-20 mg                                 | 8-32 wk | C-reactive protein (mg/L)                    | -0.3 <sup>c</sup>  | -0.45, -0.15 | <0.001* |
| Hajizadeh-Sharafabad et al. | Lutein & Zeaxanthin | RCT         | Mixed | 8-27 mg                                 | 8-32 wk | IL-6 (pg/mL)                                 | -0.40 <sup>c</sup> | -1.36, 0.54  | NR      |
| Mortality                   |                     |             |       |                                         |         |                                              |                    |              |         |
| Jayedi et al.               | Alpha-carotene      | Cohort      | Serum | H vs L                                  | 2-26 y  | Risk of all-cause mortality                  | 0.68 <sup>a</sup>  | 0.58, 0.78   | NR*     |
| Jayedi et al.               | Alpha-carotene      | Cohort      | Serum | DR: Per 0.1 µmol/L                      | 2-26 y  | Risk of all-cause mortality                  | 0.82 <sup>a</sup>  | 0.75, 0.88   | NR*     |
| Jayedi et al.               | Alpha-carotene      | Cohort      | Mixed | H vs L                                  | 2-26 y  | Risk of all-cause mortality                  | 0.79 <sup>a</sup>  | 0.63, 0.94   | NR*     |
| Jayedi et al.               | Lutein              | Cohort      | Mixed | H vs L                                  | 2-26 y  | Risk of all-cause mortality                  | 0.83 <sup>a</sup>  | 0.66, 1.00   | NR      |
| Jayedi et al.               | Lutein & Zeaxanthin | Cohort      | Serum | H vs L                                  | 2-26 y  | Risk of all-cause mortality                  | 0.85 <sup>a</sup>  | 0.74, 0.97   | NR*     |
| Jayedi et al.               | Zeaxanthin          | Cohort      | Mixed | H vs L                                  | 2-26 y  | Risk of all-cause mortality                  | 0.94 <sup>a</sup>  | 0.75, 1.13   | NR      |
| Obesity & Type 2 diabetes   |                     |             |       |                                         |         |                                              |                    |              |         |
| Jiang et al.                | Alpha-carotene      | Cohort      | Diet  | H vs L                                  | 10-23 y | Risk of Type 2 diabetes                      | 0.91 <sup>a</sup>  | 0.85, 0.96   | NR*     |
| Jiang et al.                | Alpha-carotene      | Cohort      | Serum | DR: Per 0.2 µmol/L                      | 8-10 y  | Risk of Type 2 diabetes                      | 0.65 <sup>a</sup>  | 0.33, 1.26   | NR      |
| Jiang et al.                | Alpha-carotene      | Cohort      | Serum | H vs L                                  | 8-10 y  | Risk of Type 2 diabetes                      | 0.71 <sup>a</sup>  | 0.44, 1.16   | NR      |

|                                  |                     |             |       |                    |         |                                                      |                    |             |         |
|----------------------------------|---------------------|-------------|-------|--------------------|---------|------------------------------------------------------|--------------------|-------------|---------|
| Jiang et al.                     | Alpha-carotene      | Cohort      | Diet  | DR: Per 1 mg/d     | 10-23 y | Risk of Type 2 diabetes                              | 0.88 <sup>a</sup>  | 0.73, 1.06  | NR      |
| Jiang et al.                     | Lutein              | Cohort      | Serum | H vs L             | 8-10 y  | Risk of Type 2 diabetes                              | 0.65 <sup>a</sup>  | 0.55, 0.77  | NR*     |
| Jiang et al.                     | Lutein              | Cohort      | Serum | DR: Per 0.2 µmol/L | 8-10 y  | Risk of Type 2 diabetes                              | 0.79 <sup>a</sup>  | 0.72, 0.86  | NR*     |
| Leermakers et al.                | Lutein              | Cohort & CC | Mixed | H vs L             | 10-23 y | Risk of Type 2 diabetes                              | 0.97 <sup>a</sup>  | 0.77, 1.22  | NR      |
| Jiang et al.                     | Zeaxanthin          | Cohort      | Serum | DR: Per 0.2 µmol/L | 8-10 y  | Risk of Type 2 diabetes                              | 0.67 <sup>a</sup>  | 0.41, 1.10  | NR      |
| Jiang et al.                     | Zeaxanthin          | Cohort      | Serum | H vs L             | 8-10 y  | Risk of Type 2 diabetes                              | 0.82 <sup>a</sup>  | 0.63, 1.05  | NR      |
| <b>Bone health</b>               |                     |             |       |                    |         |                                                      |                    |             |         |
| Xu et al.                        | Alpha-carotene      | Cohort      | Mixed | H vs L             | 9-17 y  | Risk of hip fracture                                 | 0.77 <sup>b</sup>  | 0.55, 1.08  | NR      |
| Xu et al.                        | Lutein & Zeaxanthin | Cohort      | Mixed | H vs L             | 9-17 y  | Risk of hip fracture                                 | 0.94 <sup>b</sup>  | 0.79, 1.11  | NR      |
| <b>Eye health</b>                |                     |             |       |                    |         |                                                      |                    |             |         |
| Jiang et al.                     | Alpha-carotene      | Cohort      | Diet  | H vs L             | 5-15 y  | Cataract incidence                                   | 0.96 <sup>a</sup>  | 0.88, 1.05  | 0.37    |
| Chong et al.                     | Alpha-carotene      | Cohort      | Mixed | H vs L             | 5-18 y  | Incidence of early aged related macular degeneration | 1.05 <sup>b</sup>  | 0.87, 1.26  | 0.59    |
| Cohen et al.                     | Alpha-carotene      | CC          | Mixed | H vs L             | 9 m     | Preeclampsia                                         | -0.01 <sup>d</sup> | -0.16, 0.15 | 0.94    |
| Jiang et al.                     | Lutein & Zeaxanthin | Cohort      | Diet  | H vs L             | 5-15 y  | Cataract incidence                                   | 0.81 <sup>a</sup>  | 0.75, 0.89  | <0.001* |
| Chong et al.                     | Lutein & Zeaxanthin | Cohort      | Mixed | H vs L             | 5-18 y  | Incidence of early aged related macular degeneration | 0.98 <sup>b</sup>  | 0.86, 1.13  | 0.82    |
| <b>Neurodegenerative disease</b> |                     |             |       |                    |         |                                                      |                    |             |         |
| Takeda et al.                    | Alpha-carotene      | Cohort & CC | Diet  | H vs L             | NR      | Risk of Parkinson's disease                          | 0.78 <sup>b</sup>  | 0.54, 1.14  | 0.21    |
| Takeda et al.                    | Lutein              | Cohort & CC | Diet  | H vs L             | NR      | Risk of Parkinson's disease                          | 1.49 <sup>b</sup>  | 0.83, 2.68  | 0.18    |
| <b>Pregnancy health</b>          |                     |             |       |                    |         |                                                      |                    |             |         |
| Cohen et al.                     | Lutein              | CC          | Mixed | H vs L             | 9 m     | Preeclampsia                                         | -0.07 <sup>d</sup> | -0.34, 0.20 | 0.61    |

CC = case control; DR = dose response; H vs L = highest dose (intervention) vs lowest dose (control); IL-6 = interleukin-6; NR = not reported; RCT = randomised controlled trial; wk = weeks; y = years

<sup>a</sup> Risk Ratio or relative risk; <sup>b</sup> Odds ratio; <sup>c</sup> Mean difference; <sup>d</sup> Standardized mean difference; <sup>e</sup> Hazard ratio.

\* Significant difference favoring the intervention.

**Table S6.** Meta-analysis results of included SLRs for the health effects of pale yellow pigments found in fruit and vegetables.

| AUTHOR                        | PIGMENT    | DESIGN      | TYPE       | DOSE            | DURATION | HEALTH OUTCOME                  | EFFECT SIZE        | 95% CI       | P-VALUE |
|-------------------------------|------------|-------------|------------|-----------------|----------|---------------------------------|--------------------|--------------|---------|
| <b>Cancer</b>                 |            |             |            |                 |          |                                 |                    |              |         |
| Hui et al.                    | Flavonols  | Cohort & CC | Diet       | H vs L          | 1-8 y    | Risk of breast cancer           | 0.88 <sup>a</sup>  | 0.80, 0.96   | NR*     |
| Grosso et al.                 | Flavonols  | Cohort      | Diet       | H vs L          | 8-13 y   | Risk of breast cancer           | 0.96 <sup>a</sup>  | 0.90, 1.03   | NR      |
| Grosso et al.                 | Flavonols  | CC          | Diet       | H vs L          | NR       | Risk of breast cancer           | 0.81 <sup>a</sup>  | 0.65, 1.02   | NR      |
| Woo & Kim a                   | Flavonols  | Cohort & CC | Mixed      | H vs L          | NR       | Risk of colorectal cancer       | 0.71 <sup>a</sup>  | 0.63, 0.81   | NR*     |
| Cui et al.                    | Flavonols  | Cohort & CC | Diet       | H vs L          | NR       | Risk of esophageal cancer       | 0.89 <sup>b</sup>  | 0.73, 1.09   | 0.28    |
| Xie et al.                    | Flavonols  | Cohort & CC | Diet       | H vs L          | 2-27 y   | Risk of gastric cancer          | 0.80 <sup>b</sup>  | 0.70, 0.91   | NR*     |
| Grosso et al.                 | Flavonols  | CC          | Diet       | H vs L          | NR       | Risk of liver cancer            | 1.18 <sup>a</sup>  | 0.76, 1.83   | NR      |
| Grosso et al.                 | Flavonols  | Cohort      | Diet       | H vs L          | 16-18 y  | Risk of lung cancer             | 0.59 <sup>a</sup>  | 0.18, 1.88   | NR      |
| Grosso et al.                 | Flavonols  | Cohort      | Diet       | H vs L          | 8-16 y   | Risk of pancreatic cancer       | 1.02 <sup>a</sup>  | 0.86, 1.20   | NR      |
| Guo et al.                    | Flavonols  | Cohort & CC | Diet       | H vs L          | 7-17 y   | Risk of prostate cancer         | 1.08 <sup>a</sup>  | 1.00, 1.18   | >0.05   |
| Hua et al.                    | Flavonols  | Cohort & CC | Diet       | H vs L          | NR       | Risk of ovarian cancer          | 0.68 <sup>a</sup>  | 0.58, 0.80   | NR*     |
| Woo & Kim b                   | Flavonols  | Cohort & CC | Mixed      | H vs L          | NR       | Risk of smoking related cancer  | 0.77 <sup>b</sup>  | 0.63, 0.95   | NR*     |
| Grosso et al.                 | Kaempferol | CC          | Diet       | H vs L          | NR       | Risk of lung cancer             | 0.77 <sup>a</sup>  | 0.62, 0.97   | NR*     |
| Grosso et al.                 | Myricetin  | CC          | Diet       | H vs L          | NR       | Risk of lung cancer             | 0.83 <sup>a</sup>  | 0.63, 1.10   | NR      |
| Grosso et al.                 | Quercitin  | CC          | Diet       | H vs L          | NR       | Risk of lung cancer             | 0.73 <sup>a</sup>  | 0.52, 1.02   | NR      |
| <b>Cardiovascular disease</b> |            |             |            |                 |          |                                 |                    |              |         |
| Fan et al.                    | Flavonols  | Cohort      | Diet       | H vs L          | 4-21 y   | Risk of CHD                     | 0.88 <sup>a</sup>  | 0.79, 0.98   | NR*     |
| Wang et al.                   | Flavonols  | Cohort      | Mixed      | H vs L          | 5-28 y   | Risk of CHD                     | 0.91 <sup>a</sup>  | 0.83, 1.01   | NR      |
| Wang et al.                   | Flavonols  | Cohort      | Mixed      | DR: Per 20 mg/d | 5-28 y   | Risk of CHD                     | 0.96 <sup>a</sup>  | 0.90, 1.03   | NR      |
| Micek et al.                  | Flavonols  | Cohort & CC | Diet       | H vs L          | 4-23 y   | Risk of CVD                     | 0.85 <sup>a</sup>  | 0.79, 0.91   | NR*     |
| Menezes et al.                | Flavonols  | RCT         | Supplement | 6-1000 mg       | 28-84 d  | Diastolic blood pressure (mmHg) | -2.63 <sup>c</sup> | -3.83, -1.42 | <0.001* |
| Menezes et al.                | Flavonols  | RCT         | Supplement | 6-1000 mg       | 14-90 d  | HDL cholesterol (mmol/L)        | 0.05 <sup>c</sup>  | 0.02, 0.07   | <0.001* |

|                          |           |        |            |                 |         |                                 |                     |              |         |
|--------------------------|-----------|--------|------------|-----------------|---------|---------------------------------|---------------------|--------------|---------|
| Godos et al.             | Flavonols | Cohort | Diet       | H vs L          | 4-14 y  | Risk of hypertension            | 0.98 <sup>a</sup>   | 0.91, 1.07   | 0.71    |
| Menezes et al.           | Flavonols | RCT    | Supplement | 6-1000 mg       | 14-90 d | LDL cholesterol (mmol/L)        | -0.14 <sup>c</sup>  | -0.21, -0.07 | <0.001* |
| Menezes et al.           | Flavonols | RCT    | Supplement | 6-728 mg        | 28-84 d | Plasma glucose (mmol/L)         | -0.18 <sup>c</sup>  | -0.29, -0.08 | <0.001* |
| Wang et al.              | Flavonols | Cohort | Mixed      | DR: Per 20 mg/d | NR      | Risk of stroke                  | 0.86 <sup>a</sup>   | 0.77, 0.96   | NR*     |
| Wang et al.              | Flavonols | Cohort | Mixed      | H vs L          | NR      | Risk of stroke                  | 0.86 <sup>a</sup>   | 0.75, 0.99   | NR*     |
| Menezes et al.           | Flavonols | RCT    | Supplement | 6-1000 mg       | 28-84 d | Systolic blood pressure (mmHg)  | -3.05 <sup>c</sup>  | -4.83, -1.27 | 0.001*  |
| Menezes et al.           | Flavonols | RCT    | Supplement | 6-1000 mg       | 14-90 d | Triacylglycerol's (mmol/L)      | -0.11 <sup>c</sup>  | -0.18, -0.03 | 0.007*  |
| Menezes et al.           | Flavonols | RCT    | Supplement | 6-1000 mg       | 14-90 d | Total cholesterol (mmol/L)      | -0.11 <sup>c</sup>  | -0.20, -0.02 | 0.021*  |
| Mohammadi-Sartang et al. | Quercitin | RCT    | Supplement | 150-500 mg      | 6-10 wk | C-reactive protein (mg/L)       | -0.33 <sup>c</sup>  | -0.50, -0.16 | <0.001* |
| Ou et al.                | Quercitin | RCT    | Supplement | 150-1000 mg     | 2-10 wk | C-reactive protein (mg/L)       | -0.11 <sup>d</sup>  | -0.32, 0.10  | 0.31    |
| Huang et al.             | Quercitin | RCT    | Supplement | 30-1000 mg      | 2-12 wk | Diastolic blood pressure (mmHg) | -2.86 <sup>c</sup>  | -5.09, -0.63 | 0.01*   |
| Guo et al.               | Quercitin | RCT    | Supplement | 100-730 mg      | 4-12 wk | HDL cholesterol (mmol/L)        | -0.06 <sup>d</sup>  | -0.19, 0.07  | NR      |
| Guo et al.               | Quercitin | RCT    | Supplement | 100-730 mg      | 4-12 wk | LDL cholesterol (mmol/L)        | -0.02 <sup>d</sup>  | -0.15, 0.11  | NR      |
| Huang et al.             | Quercitin | RCT    | Supplement | 30-1000 mg      | 2-12 wk | HDL cholesterol (mmol/L)        | 0.02 <sup>c</sup>   | -0.02, 0.06  | 0.26    |
| Ou et al.                | Quercitin | RCT    | Supplement | 100-1000 mg     | 1-10 wk | IL-6 (pg/mL)                    | -0.58 <sup>d</sup>  | -1.24, 0.09  | 0.09    |
| Peluso et al.            | Quercitin | RCT    | Supplement | 489-1000 mg     | 14-84 d | IL-6 (pg/mL)                    | -0.064 <sup>c</sup> | -0.24, 0.11  | 0.46    |
| Huang et al.             | Quercitin | RCT    | Supplement | 30-1000 mg      | 2-12 wk | LDL cholesterol (mmol/L)        | 0.02 <sup>c</sup>   | -0.07, 0.10  | 0.71    |
| Huang et al.             | Quercitin | RCT    | Supplement | 30-1000 mg      | 2-12 wk | Systolic blood pressure (mmHg)  | -3.09 <sup>c</sup>  | -4.59, -1.59 | <0.001* |
| Ou et al.                | Quercitin | RCT    | Supplement | 150-500 mg      | 6-10 wk | TNF-alpha (pg/mL)               | -0.25 <sup>d</sup>  | -0.62, 0.12  | 0.19    |
| Peluso et al.            | Quercitin | RCT    | Supplement | 150-1000 mg     | 14-84 d | TNF-alpha (pg/mL)               | -0.032 <sup>c</sup> | -0.20, 0.13  | 0.71    |
| Guo et al.               | Quercitin | RCT    | Supplement | 100-730 mg      | 4-12 wk | Total cholesterol (mmol/L)      | 0.04 <sup>d</sup>   | -0.09, 0.17  | NR      |
| Huang et al.             | Quercitin | RCT    | Supplement | 30-1000 mg      | 2-12 wk | Total cholesterol (mmol/L)      | 0.00 <sup>c</sup>   | -0.09, 0.10  | 0.93    |
| Guo et al.               | Quercitin | RCT    | Supplement | 100-730 mg      | 4-12 wk | Triglycerides (mmol/L)          | 0.05 <sup>d</sup>   | -0.08, 0.18  | NR      |
| Huang et al.             | Quercitin | RCT    | Supplement | 30-1000 mg      | 2-12 wk | Triglycerides (mmol/L)          | -0.05 <sup>c</sup>  | -0.15, 0.05  | 0.25    |
| <b>Mortality</b>         |           |        |            |                 |         |                                 |                     |              |         |
| Grosso et al.            | Flavonols | Cohort | Mixed      | H vs L          | 4-16 y  | Risk of all-cause mortality     | 0.88 <sup>a</sup>   | 0.69, 1.11   | NR      |

|                                      |           |        |            |                 |         |                             |                    |             |        |
|--------------------------------------|-----------|--------|------------|-----------------|---------|-----------------------------|--------------------|-------------|--------|
| Grosso et al.                        | Flavonols | Cohort | Mixed      | DR: Per 10 mg/d | 4-16 y  | Risk of all-cause mortality | 0.98 <sup>a</sup>  | 0.95, 1.02  | NR     |
| Huxley et al.                        | Flavonols | Cohort | Mixed      | H vs L          | 6-25 y  | Risk of CHD mortality       | 0.80 <sup>a</sup>  | 0.69, 0.93  | NR*    |
| Grosso et al.                        | Flavonols | Cohort | Mixed      | H vs L          | 5-16 y  | Risk of CVD mortality       | 0.79 <sup>a</sup>  | 0.63, 0.99  | NR*    |
| Grosso et al.                        | Flavonols | Cohort | Mixed      | DR: Per 10 mg/d | 5-16 y  | Risk of CVD mortality       | 0.87 <sup>a</sup>  | 0.76, 0.99  | NR*    |
| <b>Obesity &amp; Type 2 diabetes</b> |           |        |            |                 |         |                             |                    |             |        |
| Rienks et al.                        | Flavonols | Cohort | Diet       | H vs L          | 4-24 y  | Risk of Type 2 diabetes     | 0.92 <sup>e</sup>  | 0.85, 0.98  | NR*    |
| Akhlaghi et al.                      | Flavonols | RCT    | Supplement | 150 mg          | 1-3 m   | Waist circumference (cm)    | -0.80 <sup>c</sup> | -2.66, 1.06 | 0.40   |
| Huang et al.                         | Quercitin | RCT    | Supplement | 100-1000 mg     | 1-3 m   | Body mass index (kg/m2)     | -0.04 <sup>c</sup> | -0.54, 0.45 | 0.87   |
| Huang et al.                         | Quercitin | RCT    | Supplement | 100-1000 mg     | 1-3 m   | Body weight (kg)            | -0.35 <sup>c</sup> | -2.03, 1.33 | 0.68   |
| Ostadmohammadi et al.                | Quercitin | RCT    | Supplement | 100-1000 mg     | 4-12 wk | Fasting glucose (unit NR)   | -0.53 <sup>c</sup> | -1.81, 0.74 | NR     |
| Ostadmohammadi et al.                | Quercitin | RCT    | Supplement | 162-250 mg      | 6-8 wk  | HbA1c (unit NR)             | 0.06 <sup>c</sup>  | -0.01, 0.12 | NR     |
| Ostadmohammadi et al.                | Quercitin | RCT    | Supplement | 162-1000 mg     | 6-12 wk | HOMA-IR (unit NR)           | -0.24 <sup>c</sup> | -0.49, 0.02 | NR     |
| Ostadmohammadi et al.                | Quercitin | RCT    | Supplement | 100-1000 mg     | 6-12 wk | Insulin (unit NR)           | -0.19 <sup>c</sup> | -1.41, 1.04 | NR     |
| <b>Exercise</b>                      |           |        |            |                 |         |                             |                    |             |        |
| Pelletier et al.                     | Quercitin | RCT    | Supplement | 1000 mg         | 5-52 d  | VO2 max (%)                 | 1.94 <sup>c</sup>  | 0.30, 3.59  | 0.02*  |
| Somerville et al.                    | Quercitin | RCT    | Supplement | 500-1000 mg     | 7-56 d  | Exercise performance (%)    | 2.82 <sup>c</sup>  | 2.05, 3.58  | <.001* |

CC = case control; CVD = cardiovascular disease; CHD = coronary heart disease; d = days; DR = dose response; H vs L = highest dose (intervention) vs lowest dose (control); HbA1c = hemoglobin A1c; HOMA-IR = Homeostatic Model Assessment for Insulin Resistance; IL-6 = interleukin-6; m = months; NR = not reported; RCT = randomised controlled trial; TNF-alpha = tumor necrosis factor alpha; Total-C = total cholesterol; wk = weeks; y = years.

<sup>a</sup> Risk ratio; <sup>b</sup> Odds ratio; <sup>c</sup> Mean difference; <sup>d</sup> Standardized mean ratio; <sup>e</sup> Hazard Ratio

\* Significant difference favoring the intervention

\*\* Significant difference favoring control

**Table S7.** Meta-analysis results of included SLRs for the health effects of white pigments found in fruit and vegetables.

| AUTHOR                               | PIGMENT  | DESIGN      | TYPE  | DOSE           | DURATION | HEALTH OUTCOME                 | EFFECT SIZE       | 95% CI     | P-VALUE |
|--------------------------------------|----------|-------------|-------|----------------|----------|--------------------------------|-------------------|------------|---------|
| <b>Cancer</b>                        |          |             |       |                |          |                                |                   |            |         |
| Grosso et al.                        | Flavones | Cohort      | Diet  | H vs L         | 9-13 y   | Risk of breast cancer          | 1.01 <sup>b</sup> | 0.84, 1.21 | NR      |
| Grosso et al.                        | Flavones | CC          | Diet  | H vs L         | NR       | Risk of breast cancer          | 0.81 <sup>b</sup> | 0.68, 0.96 | NR*     |
| Hui et al.                           | Flavones | Cohort & CC | Diet  | H vs L         | 1-3 y    | Risk of breast cancer          | 0.83 <sup>b</sup> | 0.76, 0.91 | NR*     |
| Woo & Kim a                          | Flavones | Cohort & CC | Mixed | H vs L         | NR       | Risk of colorectal cancer      | 0.83 <sup>b</sup> | 0.63, 1.09 | NR*     |
| Grosso et al.                        | Flavones | CC          | Diet  | H vs L         | NR       | Risk of liver cancer           | 0.49 <sup>b</sup> | 0.30, 0.78 | NR*     |
| Grosso et al.                        | Flavones | Cohort      | Diet  | H vs L         | 16-18 y  | Risk of lung cancer            | 0.94 <sup>b</sup> | 0.87, 1.02 | NR      |
| Grosso et al.                        | Flavones | Cohort      | Diet  | H vs L         | 11-16 y  | Risk of pancreatic cancer      | 1.05 <sup>b</sup> | 0.94, 1.18 | NR      |
| Guo et al.                           | Flavones | Cohort & CC | Diet  | H vs L         | 7-16 y   | Risk of prostate cancer        | 1.04 <sup>b</sup> | 0.95, 1.14 | >0.05   |
| Cui et al.                           | Flavones | Cohort & CC | Diet  | H vs L         | NR       | Risk of esophageal cancer      | 0.78 <sup>a</sup> | 0.64, 0.95 | 0.013*  |
| Hua et al.                           | Flavones | Cohort & CC | Diet  | H vs L         | NR       | Risk of ovarian cancer         | 0.86 <sup>b</sup> | 0.71, 1.03 | NR      |
| Woo & Kim b                          | Flavones | Cohort & CC | Mixed | H vs L         | NR       | Risk of smoking related cancer | 0.77 <sup>a</sup> | 0.69, 0.85 | NR*     |
| <b>Cardiovascular disease</b>        |          |             |       |                |          |                                |                   |            |         |
| Fan et al.                           | Flavones | Cohort      | Diet  | H vs L         | 4-21 y   | Risk of CHD                    | 0.94 <sup>b</sup> | 0.89, 0.99 | NR*     |
| Micek et al.                         | Flavones | Cohort & CC | Diet  | H vs L         | 4-23 y   | Risk of CVD                    | 0.91 <sup>b</sup> | 0.82, 1.01 | NR      |
| Godos et al.                         | Flavones | Cohort      | Diet  | H vs L         | 4-14 y   | Risk of hypertension           | 0.96 <sup>b</sup> | 0.90, 1.02 | 0.2     |
| <b>Mortality</b>                     |          |             |       |                |          |                                |                   |            |         |
| Grosso et al.                        | Flavones | Cohort      | Mixed | H vs L         | 4-16 y   | Risk of all-cause mortality    | 0.86 <sup>b</sup> | 0.80, 0.93 | NR*     |
| Grosso et al.                        | Flavones | Cohort      | Mixed | DR: Per 1 mg/d | 4-16 y   | Risk of all-cause mortality    | 0.96 <sup>b</sup> | 0.88, 1.04 | NR      |
| Grosso et al.                        | Flavones | Cohort      | Mixed | H vs L         | 5-16 y   | Risk of CVD mortality          | 0.85 <sup>b</sup> | 0.75, 0.96 | NR*     |
| Grosso et al.                        | Flavones | Cohort      | Mixed | DR: Per 1 mg/d | 5-16 y   | Risk of CVD mortality          | 0.93 <sup>b</sup> | 0.90, 0.97 | NR*     |
| <b>Obesity &amp; Type 2 diabetes</b> |          |             |       |                |          |                                |                   |            |         |
| Rienks et al.                        | Flavones | Cohort      | Diet  | H vs L         | 4-24 y   | Risk of Type 2 diabetes        | 0.97 <sup>c</sup> | 0.87, 1.08 | NR      |

CC = case control; CVD = cardiovascular disease; CHD = coronary heart disease; DR = dose response; H vs L = highest dose (intervention) vs lowest dose (control); IL-6 = interleukin-6; NR = not reported; RCT = randomised controlled trial; y = years.

<sup>a</sup>Odds ratio; <sup>b</sup> Risk ratio or relative risk; <sup>c</sup> Hazard ratio.

\* Significant difference favoring the intervention.

**Table S8.** Meta-analysis results of included SLRs for the health effects of purple/blue pigments found in fruit and vegetables.

| AUTHOR                        | PIGMENT           | DESIGN      | TYPE       | DOSE          | DURATION | HEALTH OUTCOME                   | EFFECT SIZE        | 95% CI       | P-VALUE |
|-------------------------------|-------------------|-------------|------------|---------------|----------|----------------------------------|--------------------|--------------|---------|
| <b>Cancer</b>                 |                   |             |            |               |          |                                  |                    |              |         |
| Grosso et al.                 | Anthocyanins      | Cohort      | Diet       | H vs L        | 9-13 y   | Risk of breast cancer            | 1.00 <sup>b</sup>  | 0.91, 1.10   | NR      |
| Grosso et al.                 | Anthocyanins      | CC          | Diet       | H vs L        | NR       | Risk of breast cancer            | 1.06 <sup>b</sup>  | 0.96, 1.16   | NR      |
| Hui et al.                    | Anthocyanins      | Cohort & CC | Diet       | H vs L        | 1-3 y    | Risk of breast cancer            | 0.97 <sup>b</sup>  | 0.87, 1.08   | NR      |
| Yang et al.                   | Anthocyanins      | Cohort      | Diet       | H vs L        | 1-12 y   | Risk of gastric cancer           | 0.92 <sup>b</sup>  | 0.81, 1.04   | NR      |
| Grosso et al.                 | Anthocyanins      | CC          | Diet       | H vs L        | NR       | Risk of liver cancer             | 1.37 <sup>b</sup>  | 0.89, 2.11   | NR      |
| Grosso et al.                 | Anthocyanins      | Cohort      | Diet       | H vs L        | 16-18 y  | Risk of lung cancer              | 0.97 <sup>b</sup>  | 0.92, 1.02   | NR      |
| Cui et al.                    | Anthocyanins      | Cohort & CC | Diet       | H vs L        | NR       | Risk of esophageal cancer        | 0.60 <sup>a</sup>  | 0.49, 0.74   | <0.001* |
| Grosso et al.                 | Anthocyanins      | Cohort      | Diet       | H vs L        | 11 y     | Risk of pancreatic cancer        | 1.08 <sup>b</sup>  | 0.96, 1.22   | NR      |
| Woo & Kim a                   | Anthocyanidins    | Cohort & CC | Mixed      | H vs L        | NR       | Risk of colorectal cancer        | 0.68 <sup>b</sup>  | 0.56, 0.82   | NR*     |
| Guo et al.                    | Anthocyanidins    | Cohort & CC | Diet       | H vs L        | 7-16 y   | Risk of prostate cancer          | 1.12 <sup>b</sup>  | 1.03, 1.21   | 0.01**  |
| Woo & Kim b                   | Anthocyanidins    | Cohort      | Mixed      | H vs L        | NR       | Risk of smoking related cancer   | 0.89 <sup>a</sup>  | 0.79, 1.01   | NR      |
| Grosso et al.                 | Proanthocyanidins | Cohort      | Diet       | H vs L        | 9-13 y   | Risk of breast cancer            | 0.94 <sup>b</sup>  | 0.87, 1.01   | NR      |
| Woo & Kim a                   | Proanthocyanidins | Cohort & CC | Mixed      | H vs L        | NR       | Risk of colorectal cancer        | 0.72 <sup>b</sup>  | 0.61, 0.85   | NR*     |
| Cui et al.                    | Proanthocyanidins | Cohort & CC | Diet       | H vs L        | NR       | Risk of esophageal cancer        | 0.95 <sup>a</sup>  | 0.72, 1.26   | 0.73    |
| <b>Cardiovascular disease</b> |                   |             |            |               |          |                                  |                    |              |         |
| Fallah et al.                 | Anthocyanins      | RCT         | Supplement | 11.2-1323 mg  | 6-24 wk  | Adiponectin (µg/mL)              | 0.75 <sup>c</sup>  | 0.23, 1.26   | 0.004*  |
| Sangsefidi et al.             | Anthocyanins      | RCT         | Mixed      | 0.77-531 mg   | 4-12 wk  | Alanine Aminotransferase (U/L)   | -1.08 <sup>c</sup> | -3.96, 1.79  | 0.46    |
| Shah & Shah                   | Anthocyanins      | RCT         | Mixed      | 80-320 mg     | 12-24 wk | Apolipoprotein A1 (mg/dL)        | 6.10 <sup>c</sup>  | 4.51, 7.69   | 0.007*  |
| Shah & Shah                   | Anthocyanins      | RCT         | Mixed      | 80-320 mg     | 12-24 wk | Apolipoprotein B (mg/dL)         | -7.13 <sup>c</sup> | -8.66, -5.59 | 0.006*  |
| Sangsefidi et al.             | Anthocyanins      | RCT         | Mixed      | 0.77-531 mg   | 4-12 wk  | Aspartate Aminotransferase (U/L) | -1.71 <sup>c</sup> | -3.60, 0.17  | 0.08    |
| Daneshzad et al.              | Anthocyanins      | RCT         | Supplement | 31.45-600 mg  | 6-24 wk  | Body mass index (kg/m2)          | 0.71 <sup>c</sup>  | -0.88, 2.30  | 0.38    |
| Daneshzad et al.              | Anthocyanins      | RCT         | Supplement | 31.45-1050 mg | 6-24 wk  | Body weight (kg)                 | 1.71 <sup>c</sup>  | -2.14, 5.55  | 0.39    |



|                   |              |             |            |               |             |                                           |                    |              |         |
|-------------------|--------------|-------------|------------|---------------|-------------|-------------------------------------------|--------------------|--------------|---------|
| Fan et al.        | Anthocyanins | Cohort      | Diet       | H vs L        | 4-24 y      | Risk of CHD                               | 0.90 <sup>b</sup>  | 0.83, 0.98   | NR*     |
| Kimble et al.     | Anthocyanins | Cohort      | Mixed      | H vs L        | 6-26 y      | Risk of CHD                               | 0.91 <sup>b</sup>  | 0.83, 0.99   | NR*     |
| Fallah et al.     | Anthocyanins | RCT         | Mixed      | 154-320 mg    | 12 wk       | C-peptide (µg/L)                          | -0.02 <sup>c</sup> | -0.20, 0.16  | 0.82    |
| Sangsefidi et al. | Anthocyanins | RCT         | Supplement | 45.1-640 mg   | 3-24 wk     | C-reactive protein (mg/L)                 | 0.02 <sup>d</sup>  | -0.44, 0.48  | 0.94    |
| Fallah et al.     | Anthocyanins | RCT         | Supplement | 1.65-1323 mg  | 3-24 wk     | C-reactive protein (mg/L)                 | -0.33 <sup>c</sup> | -0.55, -0.11 | 0.003*  |
| Shah & Shah       | Anthocyanins | RCT         | Mixed      | 80-320 mg     | 4 h - 12 wk | hs C-reactive protein (mg/dL)             | 0.16 <sup>c</sup>  | -0.06, 0.39  | 0.63    |
| Micek et al.      | Anthocyanins | Cohort & CC | Diet       | H vs L        | 4-23 y      | Risk of CVD                               | 0.82 <sup>b</sup>  | 0.70, 0.96   | NR*     |
| Daneshzad et al.  | Anthocyanins | RCT         | Supplement | 31.45-500 mg  | 1-96 wk     | Diastolic blood pressure (mmHg)           | 0.66 <sup>c</sup>  | -0.82, 2.14  | 0.38    |
| Fallah et al.     | Anthocyanins | RCT         | Mixed      | 6.5-1024 mg   | 2 wk - 6 m  | Fasting glucose (mg/dL)                   | -2.70 <sup>c</sup> | -4.07, -1.33 | <0.001* |
| Sangsefidi et al. | Anthocyanins | RCT         | Mixed      | 67.5-531 mg   | 8-12 wk     | Gamma-Glutamyl Transferase (U/L)          | -3.75 <sup>c</sup> | -11.63, 4.12 | 0.35    |
| Fallah et al.     | Anthocyanins | RCT         | Mixed      | 7.35-742 mg   | 6-24 wk     | HbA1c (%)                                 | -0.21 <sup>c</sup> | -0.39, -0.03 | 0.019*  |
| Fallah et al.     | Anthocyanins | RCT         | Mixed      | 75.7-531 mg   | 4 wk - 6 m  | HOMA-IR                                   | -0.54 <sup>c</sup> | -0.94, -0.14 | 0.008*  |
| Araki et al.      | Anthocyanins | RCT         | Mixed      | 1.65-320 mg   | 4-24 wk     | HDL cholesterol (mmol/L)                  | 0.09 <sup>c</sup>  | 0.02, 0.15   | 0.006*  |
| Shah & Shah       | Anthocyanins | RCT         | Mixed      | 80-500 mg     | 4 h -24 wk  | HDL cholesterol (mg/dL)                   | 1.67 <sup>c</sup>  | 0.80, 2.54   | <0.001* |
| Godos et al.      | Anthocyanins | Cohort      | Diet       | H vs L        | 4-14 y      | Risk of hypertension                      | 0.92 <sup>b</sup>  | 0.88, 0.97   | 0.002*  |
| Fallah et al.     | Anthocyanins | RTC         | Supplement | NR            | NR          | IL-1 beta (pg/mL)                         | 1.71 <sup>c</sup>  | -3.77, 2.88  | 0.79    |
| Fallah et al.     | Anthocyanins | RCT         | Supplement | 6-1323 mg     | 3-12 wk     | IL-6 (pg/mL)                              | -0.41 <sup>c</sup> | -0.70, -0.13 | 0.004*  |
| Shah & Shah       | Anthocyanins | RCT         | Mixed      | 200-500 mg    | 3-12 wk     | IL-6 (pg/mL)                              | 1.17 <sup>c</sup>  | 0.80, 1.53   | 0.83    |
| Fallah et al.     | Anthocyanins | RCT         | Supplement | 1.6-640 mg    | 4-12 wk     | Intracellular adhesion molecule-1 (ng/mL) | -52.4 <sup>c</sup> | -85.7, -19.1 | 0.002*  |
| Araki et al.      | Anthocyanins | RCT         | Mixed      | 1.65-320 mg   | 4-24 wk     | LDL cholesterol (mmol/L)                  | -0.19 <sup>c</sup> | -0.31, -0.06 | 0.003*  |
| Fallah et al.     | Anthocyanins | RCT         | Mixed      | 154-320 mg    | 12-24 wk    | Plasminogen activator inhibitor-1 (µg/L)  | -5.09 <sup>c</sup> | -9.45, -0.73 | 0.02*   |
| Fallah et al.     | Anthocyanins | RTC         | Supplement | NR            | NR          | P-selectin (ng/mL)                        | -6.98 <sup>c</sup> | -18.1, 4.15  | 0.22    |
| Fallah et al.     | Anthocyanins | RCT         | Mixed      | 70.7-199.6 mg | 4-12 wk     | Resistin (µg/L)                           | -1.23 <sup>c</sup> | -2.4, -0.05  | 0.04*   |
| Kimble et al.     | Anthocyanins | Cohort      | Mixed      | H vs L        | 5-41 y      | Risk of stroke                            | 1.00 <sup>b</sup>  | 0.93, 1.07   | NR      |
| Fallah et al.     | Anthocyanins | RCT         | Supplement | 6-742 mg      | 3-24 wk     | TNF-alpha (pg/mL)                         | -0.64 <sup>c</sup> | -1.18, -0.09 | 0.023*  |
| Araki et al.      | Anthocyanins | RCT         | Mixed      | 1.65-320 mg   | 4-24 wk     | Total cholesterol (mmol/L)                | -0.19 <sup>c</sup> | -0.42, 0.04  | 0.1     |

|                      |                   |             |            |                 |             |                                      |                    |                |         |
|----------------------|-------------------|-------------|------------|-----------------|-------------|--------------------------------------|--------------------|----------------|---------|
| Araki et al.         | Anthocyanins      | RCT         | Mixed      | 1.65-320 mg     | 4-24 wk     | Triglycerides (mmol/L)               | -0.20 <sup>c</sup> | -0.33, -0.07   | 0.003*  |
| Fallah et al.        | Anthocyanins      | RCT         | Mixed      | 75.7-668 mg     | 4-24 wk     | Serum insulin (mU/L)                 | 0.33 <sup>c</sup>  | -0.18, 0.85    | 0.21    |
| Daneshzad et al.     | Anthocyanins      | RCT         | Supplement | 31.45-500 mg    | 1-96 wk     | Systolic blood pressure (mmHg)       | 1.80 <sup>c</sup>  | -0.92, 4.52    | 0.20    |
| Fallah et al.        | Anthocyanins      | RCT         | Supplement | 1.6-640 mg      | 4-12 wk     | Vascular adhesion molecule-1 (ng/mL) | -49.6 <sup>c</sup> | -72.7, -26.5   | <0.001* |
| Fairlie-Jones et al. | Anthocyanins      | RCT         | Mixed      | 1.34-581 mg     | 1 d - 6 m   | Vascular reactivity                  | 0.77 <sup>d</sup>  | 0.37, 1.16     | <0.001* |
| Fairlie-Jones et al. | Anthocyanins      | RCT         | Mixed      | 26-625 mg       | 1 wk - 4 m  | Vascular stiffness                   | -0.19 <sup>d</sup> | -0.39, 0.01    | 0.06    |
| Daneshzad et al.     | Anthocyanins      | RCT         | Supplement | 31.45-320 mg    | 6-24 wk     | Waist circumference (cm)             | 2.7 <sup>c</sup>   | -2.98, 8.83    | 0.35    |
| Shah & Shah          | Anthocyanins      | RCT         | Mixed      | 80-500 mg       | 4 hr -24 wk | LDL cholesterol (mg/dL)              | -8.86 <sup>c</sup> | -11.17, -20.02 | <0.001* |
| Shah & Shah          | Anthocyanins      | RCT         | Mixed      | 80-320 mg       | 12-24 wk    | TNF-alpha (pg/mL)                    | -1.98 <sup>c</sup> | -2.40, -1.55   | 0.001*  |
| Shah & Shah          | Anthocyanins      | RCT         | Mixed      | 80-500 mg       | 4 h -24 wk  | Total cholesterol (mg/dL)            | -3.55 <sup>c</sup> | -10.8, 3.67    | 0.46    |
| Shah & Shah          | Anthocyanins      | RCT         | Mixed      | 80-320 mg       | 4 h -24 wk  | Triglycerides (mg/dL)                | -9.14 <sup>c</sup> | -14.02, -4.13  | 0.014*  |
| Ren et al.           | Proanthocyanidins | RCT         | Supplement | 100-400 mg      | 5-16 wk     | Diastolic blood pressure (mmHg)      | -2.75 <sup>c</sup> | -5.09, -0.41   | 0.021*  |
| Ren et al.           | Proanthocyanidins | RCT         | Supplement | 100-400 mg      | 5-16 wk     | Mean arterial pressure (mmHg)        | -3.37 <sup>c</sup> | -6.72, -0.01   | 0.049*  |
| Ren et al.           | Proanthocyanidins | RCT         | Supplement | 100-400 mg      | 5-16 wk     | Pulse pressure (mmHg)                | -2.13 <sup>c</sup> | -6.29, 2.03    | 0.32    |
| Ren et al.           | Proanthocyanidins | RCT         | Supplement | 100-400 mg      | 5-16 wk     | Systolic blood pressure (mmHg)       | -4.60 <sup>c</sup> | -8.04, -1.16   | 0.009*  |
| Ren et al.           | Proanthocyanins   | Cohort      | Diet       | H vs L          | 4-16 y      | Risk of CHD                          | 0.78 <sup>b</sup>  | 0.65, 0.94     | NR*     |
| Micek et al.         | Proanthocyanins   | Cohort & CC | Diet       | H vs L          | 4-16 y      | Risk of CVD                          | 0.83 <sup>b</sup>  | 0.73, 0.95     | NR*     |
| <b>Mortality</b>     |                   |             |            |                 |             |                                      |                    |                |         |
| Kimble et al.        | Anthocyanins      | Cohort      | Mixed      | H vs L          | 5-15 y      | Risk of CVD mortality                | 0.92 <sup>b</sup>  | 0.87, 0.97     | NR*     |
| Grosso et al.        | Anthocyanidins    | Cohort      | Mixed      | H vs L          | 4-16 y      | Risk of all-cause mortality          | 0.89 <sup>b</sup>  | 0.85, 0.94     | NR*     |
| Grosso et al.        | Anthocyanidins    | Cohort      | Mixed      | H vs L          | 5-16 y      | Risk of CVD mortality                | 0.89 <sup>b</sup>  | 0.83, 0.95     | NR*     |
| Grosso et al.        | Anthocyanidins    | Cohort      | Mixed      | DR: Per 10 mg/d | 5-7 y       | Risk of CVD mortality                | 0.94 <sup>b</sup>  | 0.88, 0.99     | NR*     |
| Grosso et al.        | Proanthocyanidins | Cohort      | Mixed      | H vs L          | 4-16 y      | Risk of all-cause mortality          | 0.85 <sup>b</sup>  | 0.70, 1.03     | NR      |
| Grosso et al.        | Proanthocyanidins | Cohort      | Mixed      | H vs L          | 5-16 y      | Risk of CVD mortality                | 0.89 <sup>b</sup>  | 0.81, 0.97     | NR*     |
| Grosso et al.        | Proanthocyanidins | Cohort      | Mixed      | DR: Per 10 mg/d | 5-16 y      | Risk of CVD mortality                | 0.97 <sup>b</sup>  | 0.94, 1.00     | NR      |

#### Obesity & Type 2 diabetes

|                 |                   |        |            |           |         |                                          |                     |              |         |
|-----------------|-------------------|--------|------------|-----------|---------|------------------------------------------|---------------------|--------------|---------|
| Park et al.     | Anthocyanins      | RCT    | Supplement | 28-500 mg | 4-24 wk | Body mass index (kg/m2)                  | -0.36 <sup>c</sup>  | -0.58, -0.13 | 0.002*  |
| Park et al.     | Anthocyanins      | RCT    | Supplement | 31-375 mg | 4-8 wk  | Body weight (kg)                         | 0.15 <sup>c</sup>   | 0.01, 0.29   | 0.04*   |
| Rienks et al.   | Anthocyanidins    | Cohort | Diet       | H vs L    | 4-20 y  | Risk of Type 2 diabetes                  | 0.86 <sup>e</sup>   | 0.81, 0.91   | NR*     |
| Rienks et al.   | Proanthocyanidins | Cohort | Diet       | H vs L    | NR      | Risk of Type 2 diabetes                  | 0.88 <sup>e</sup>   | 0.75, 1.02   | NR      |
| <b>Exercise</b> |                   |        |            |           |         |                                          |                     |              |         |
| Bloedon et al.  | Anthocyanins      | RCT    | Diet       | NR        | <2-6 wk | Catalase                                 | 0.17 <sup>d</sup>   | -0.51, 0.86  | 0.62    |
| Kimble et al.   | Anthocyanins      | RCT    | Diet       | 10-640 mg | 3-28 d  | Countermovement jump, 48hr post (ng/mL)  | 0.57 <sup>c</sup>   | 0.04, 1.10   | 0.004*  |
| Bloedon et al.  | Anthocyanins      | RCT    | Diet       | NR        | <2-6 wk | C-reactive protein                       | -0.33 <sup>d</sup>  | -0.83, 0.17  | 0.19    |
| Bloedon et al.  | Anthocyanins      | RCT    | Diet       | NR        | <2-6 wk | hs C-reactive protein                    | -0.44 <sup>d</sup>  | -0.77, -0.11 | 0.009*  |
| Kimble et al.   | Anthocyanins      | RCT    | Mixed      | 8-547 mg  | 7-28 d  | C-reactive protein, 48hr post            | -0.24 <sup>d</sup>  | -0.57, 0.09  | NR      |
| Kimble et al.   | Anthocyanins      | RCT    | Mixed      | 8-547 mg  | 7-30 d  | Creatine kinase, 48hr post               | -0.31 <sup>d</sup>  | -0.55, -0.08 | <0.01*  |
| Kimble et al.   | Anthocyanins      | RCT    | Mixed      | 5-546 mg  | 3-30 d  | Delayed onset muscle soreness, 48hr post | -0.20 <sup>d</sup>  | -0.40, 0.00  | NR      |
| Bloedon et al.  | Anthocyanins      | RCT    | Diet       | NR        | <2-6 wk | Glutathione peroxidase                   | 0.28 <sup>d</sup>   | -0.46, 1.01  | 0.46    |
| Bloedon et al.  | Anthocyanins      | RCT    | Diet       | NR        | <2-6 wk | Hiobarbituric acid species               | -0.27 <sup>d</sup>  | -0.67, 0.13  | 0.19    |
| Bloedon et al.  | Anthocyanins      | RCT    | Diet       | NR        | <2-6 wk | IL-1b                                    | 0.081 <sup>d</sup>  | -0.31, 0.47  | 0.69    |
| Bloedon et al.  | Anthocyanins      | RCT    | Diet       | NR        | <2-6 wk | IL-6                                     | -0.75 <sup>d</sup>  | -1.21, -0.29 | 0.002*  |
| Kimble et al.   | Anthocyanins      | RCT    | Mixed      | 8-640 mg  | 7-30 d  | IL-6, 48hr post                          | -0.30 <sup>d</sup>  | -0.66, 0.06  | NR      |
| Bloedon et al.  | Anthocyanins      | RCT    | Diet       | NR        | <2-6 wk | IL-8                                     | -0.20 <sup>d</sup>  | -0.54, 0.14  | 0.25    |
| Bloedon et al.  | Anthocyanins      | RCT    | Diet       | NR        | <2-6 wk | Inflammation outcomes                    | -0.47 <sup>d</sup>  | -0.69, -0.25 | <0.001* |
| Bloedon et al.  | Anthocyanins      | RCT    | Diet       | NR        | <2-6 wk | Lipid hydroperoxides                     | -0.68 <sup>d</sup>  | -1.80, 0.44  | 0.23    |
| Bloedon et al.  | Anthocyanins      | RCT    | Diet       | NR        | <2-6 wk | Malondialdehyde                          | -0.65 <sup>d</sup>  | -1.02, -0.29 | <.001*  |
| Kimble et al.   | Anthocyanins      | RCT    | Mixed      | 8-547 mg  | 3-30 d  | Maximal voluntary contraction, 48hr post | 0.67 <sup>d</sup>   | 0.32, 1.02   | NR*     |
| Bloedon et al.  | Anthocyanins      | RCT    | Diet       | NR        | <2-6 wk | Nitrotyrosine                            | -0.001 <sup>d</sup> | -0.46, 0.46  | 1.00    |
| Bloedon et al.  | Anthocyanins      | RCT    | Diet       | NR        | <2-6 wk | Oxidative stress outcomes                | -0.32 <sup>d</sup>  | -0.62, -0.02 | 0.04*   |
| Bloedon et al.  | Anthocyanins      | RCT    | Diet       | NR        | <2-6 wk | Protein carbonyls                        | -1.61 <sup>d</sup>  | -3.18, -0.40 | 0.05*   |
| Bloedon et al.  | Anthocyanins      | RCT    | Diet       | NR        | <2-6 wk | Superoxide dismutase                     | 0.06 <sup>d</sup>   | -0.45, 0.56  | 0.83    |

|                |              |     |       |           |         |                                       |                    |              |       |
|----------------|--------------|-----|-------|-----------|---------|---------------------------------------|--------------------|--------------|-------|
| Kimble et al.  | Anthocyanins | RCT | Mixed | 8-547 mg  | 8-28 d  | Total antioxidant capacity, 48hr post | 0.40 <sup>d</sup>  | -0.04, 0.84  | NR    |
| Bloedon et al. | Anthocyanins | RCT | Diet  | NR        | <2-6 wk | TNF-alpha                             | -0.45 <sup>d</sup> | -0.82, -0.08 | 0.02* |
| Kimble et al.  | Anthocyanins | RCT | Mixed | 66-546 mg | 7-10 d  | TNF-alpha, 48hr post                  | -0.29 <sup>d</sup> | -0.69, 0.11  | NR    |
| Bloedon et al. | Anthocyanins | RCT | Diet  | NR        | <2-6 wk | Total antioxidant capacity            | 0.49 <sup>d</sup>  | -0.09, 1.08  | 0.10  |
| Bloedon et al. | Anthocyanins | RCT | Diet  | NR        | <2-6 wk | Uric acid                             | -0.12 <sup>d</sup> | -0.93, 0.69  | 0.78  |

CC = case control; CVD = cardiovascular disease; CHD = coronary heart disease; d = days; DR = dose response; H vs L = highest dose (intervention) vs lowest dose (control); hs = high sensitivity; h = hours; HbA1c = hemoglobin A1c; HOMA-IR = Homeostatic Model Assessment for Insulin Resistance; IL-6 = interleukin-6; m = months; NR = not reported; RCT = randomised controlled trial; TNF-alpha = tumor necrosis factor alpha; Total-C = total cholesterol; wk = weeks; y = years.

<sup>a</sup> Odds ratio; <sup>b</sup> Risk ratio or relative risk; <sup>c</sup> Mean difference; <sup>d</sup> Standardized mean difference; <sup>e</sup> Hazard ratio.

\* Significant difference favoring the intervention.

\*\* Significant difference favoring control.

**Table S9.** Results of included RCTs and cohort studies for the health effects of green pigments found in fruit and vegetables.

| AUTHOR                            | PIGMENT     | DESIGN | TYPE       | DOSE    | DURATION | HEALTH OUTCOME                | EFFECT SIZE        | 95% CI       | P-VALUE |
|-----------------------------------|-------------|--------|------------|---------|----------|-------------------------------|--------------------|--------------|---------|
| <b>Cancer</b>                     |             |        |            |         |          |                               |                    |              |         |
| Balder et al.                     | Chlorophyll | Cohort | Diet       | H v L   | 9 y      | Risk of colorectal cancer (M) | 0.94 <sup>a</sup>  | 0.72, 1.23   | 0.50    |
| Balder et al.                     | Chlorophyll | Cohort | Diet       | H v L   | 9 y      | Risk of colorectal cancer (F) | 1.20 <sup>a</sup>  | 0.86, 1.69   | 0.24    |
| Balder et al.                     | Chlorophyll | Cohort | Diet       | H v L   | 9 y      | Risk of colon cancer (M)      | 0.78 <sup>a</sup>  | 0.57, 1.07   | 0.08    |
| Balder et al.                     | Chlorophyll | Cohort | Diet       | H v L   | 9 y      | Risk of Colon cancer (F)      | 1.19 <sup>a</sup>  | 0.80, 1.77   | 0.43    |
| Balder et al.                     | Chlorophyll | Cohort | Diet       | H v L   | 9 y      | Risk of rectal cancer (M)     | 1.27 <sup>a</sup>  | 0.80, 2.02   | 0.49    |
| Balder et al.                     | Chlorophyll | Cohort | Diet       | H v L   | 9 y      | Risk of rectal cancer (F)     | 1.20 <sup>a</sup>  | 0.68, 2.12   | 0.25    |
| <b>Seasonal Allergic Rhinitis</b> |             |        |            |         |          |                               |                    |              |         |
| Fujiwara et al.                   | Chlorophyll | RCT    | Supplement | 0.7 mg  | 8 w      | Rescue medication scores      | -3.09 <sup>b</sup> | -5.96, -0.22 | 0.045*  |
| Fujiwara et al.                   | Chlorophyll | RCT    | Supplement | 0.7 mg  | 12 w     | Rescue medication scores      | -1.40 <sup>b</sup> | NR           | 0.37    |
| <b>Cardiovascular disease</b>     |             |        |            |         |          |                               |                    |              |         |
| Montelius et al.                  | Chlorophyll | RCT    | Supplement | 3000 mg | 12 w     | Weight loss (kg)              | -1.50 <sup>b</sup> | -3.06, 0.06  | 0.06    |
| Montelius et al.                  | Chlorophyll | RCT    | Supplement | 3000 mg | 12 w     | Fat free mass (kg)            | -0.70 <sup>b</sup> | -1.56, 0.16  | 0.11    |
| Montelius et al.                  | Chlorophyll | RCT    | Supplement | 3000 mg | 12 w     | Body fat (kg)                 | -0.80 <sup>b</sup> | -2.32, 0.72  | 0.29    |
| Montelius et al.                  | Chlorophyll | RCT    | Supplement | 3000 mg | 12 w     | Body fat (%)                  | -0.20 <sup>b</sup> | -1.56, 1.16  | 0.77    |
| Montelius et al.                  | Chlorophyll | RCT    | Supplement | 3000 mg | 12 w     | Waist (cm)                    | -1.50 <sup>b</sup> | -3.87, 0.87  | 0.21    |
| Montelius et al.                  | Chlorophyll | RCT    | Supplement | 3000 mg | 12 w     | Insulin (mIE/L)               | 0.10 <sup>b</sup>  | -2.30, 2.50  | 0.93    |
| Montelius et al.                  | Chlorophyll | RCT    | Supplement | 3000 mg | 12 w     | Glucose (mmol/L)              | -0.16 <sup>b</sup> | -0.42, 0.10  | 0.21    |
| Montelius et al.                  | Chlorophyll | RCT    | Supplement | 3000 mg | 12 w     | Leptin (ng/mL)                | -3.20 <sup>b</sup> | -13.41, 7.01 | 0.53    |

F = females; H vs L = highest dose (intervention) vs lowest dose (control); M = males; NR = not reported; RCT = randomised controlled trial; wk = weeks; y = years

<sup>a</sup> Risk ratio or relative risk; <sup>b</sup> Mean difference.

\* Significant difference favoring the intervention.

**Table S10.** PubMed systematic search strategy to identify umbrella reviews and systematic literature reviews of meta-analyses.

| SEARCH<br>PHASE | PIGMENT<br>CLASS | INTERVENTION                                                                                                                                                                                                                                                                                                                                                                                                                                                                                                                                                                                                                                                                                                                                                                                                                                                              | STUDY DESIGN                                                                                                                                                                                                                                                                                                                                                                                                     |
|-----------------|------------------|---------------------------------------------------------------------------------------------------------------------------------------------------------------------------------------------------------------------------------------------------------------------------------------------------------------------------------------------------------------------------------------------------------------------------------------------------------------------------------------------------------------------------------------------------------------------------------------------------------------------------------------------------------------------------------------------------------------------------------------------------------------------------------------------------------------------------------------------------------------------------|------------------------------------------------------------------------------------------------------------------------------------------------------------------------------------------------------------------------------------------------------------------------------------------------------------------------------------------------------------------------------------------------------------------|
| 1               | Carotenoids      | (caroten*[Title/Abstract] OR tetraterpene*[Title/Abstract] lycopene[Title/Abstract] OR cryptoxanthin[Title/Abstract] OR capsorubin[Title/Abstract] OR capsanthin[Title/Abstract] OR lutein[Title/Abstract] OR zeaxanthin[Title/Abstract] OR betaxanthin[Title/Abstract] OR violaxanthin[Title/Abstract] OR xanthophyll*[Title/Abstract] OR carotenoids[MeSH Terms] OR beta carotene[MeSH Terms] OR lycopene[MeSH Terms] OR xanthophylls[MeSH Terms]                                                                                                                                                                                                                                                                                                                                                                                                                       | AND<br>(systematic[Title/Abstract] OR "meta-analysis"[Title/Abstract] OR "metaanalysis"[Title/Abstract] OR "meta-analyses"[Title/Abstract] OR "metaanalyses"[Title/Abstract] OR "literature review"[Title/Abstract] OR "meta-regression"[Title/Abstract] OR umbrella[Title/Abstract] OR systematic review[Publication Type] OR scientific integrity review[Publication Type] OR meta-analysis[Publication Type]) |
|                 | Flavonoids       | anthocyan*[Title/Abstract] OR cyanidin[Title/Abstract] OR malvidin[Title/Abstract] OR peonidin[Title/Abstract] OR delphinidin[Title/Abstract] OR pelargonidin[Title/Abstract] OR petunidin[Title/Abstract] OR aurone*[Title/Abstract] OR chalcone*[Title/Abstract] OR anthoxanthin*[Title/Abstract] OR flavonol*[Title/Abstract] OR kaempferol[Title/Abstract] OR quercetin[Title/Abstract] OR myricetin[Title/Abstract] OR flavone*[Title/Abstract] OR apigenin[Title/Abstract] OR luteolin[Title/Abstract] OR isoetin[Title/Abstract] OR tannin*[Title/Abstract] OR proanthocyanidin*[Title/Abstract] OR anthocyanins[MeSH Terms] OR flavonols[MeSH Terms] OR kaempferols[MeSH Terms] OR quercetin[MeSH Terms] OR chalcones[MeSH Terms] OR flavones[MeSH Terms] OR apigenin[MeSH Terms] OR luteolin[MeSH Terms] OR tannins[MeSH Terms] OR proanthocyanidins[MeSH Terms] |                                                                                                                                                                                                                                                                                                                                                                                                                  |
|                 | Betalains        | betalain*[Title/Abstract] OR betacyanin*[Title/Abstract] OR betaxanthin*[Title/Abstract] OR betanin[Title/Abstract] OR indicaxanthin[Title/Abstract] OR vulgaxanthin[Title/Abstract] OR betalains[MeSH Terms] OR betacyanins[MeSH Terms] OR betaxanthins[MeSH Terms] OR                                                                                                                                                                                                                                                                                                                                                                                                                                                                                                                                                                                                   |                                                                                                                                                                                                                                                                                                                                                                                                                  |
|                 | Chlorophylls     | chlorophyll*[Title/Abstract] OR chlorophyll[MeSH Terms] OR chlorophyll A[MeSH Terms])                                                                                                                                                                                                                                                                                                                                                                                                                                                                                                                                                                                                                                                                                                                                                                                     |                                                                                                                                                                                                                                                                                                                                                                                                                  |

**Table S11.** Systematic search strategy for EMBASE, CINAHL and Cochrane Library.<sup>1</sup>

| DATABASE | SEARCH STRATEGY                                                                                                                                                                                                                                                                                                                                                                                                                                                                                                                                                                                                                                                                                                                                                                                                                                                                                                                                                                                                                                                                                                                                                                                                                                                                                                                                                                                                                                                                                                                                                                                                                                                                                                                                                                                                                                                                                                                                                                                                                                                        |
|----------|------------------------------------------------------------------------------------------------------------------------------------------------------------------------------------------------------------------------------------------------------------------------------------------------------------------------------------------------------------------------------------------------------------------------------------------------------------------------------------------------------------------------------------------------------------------------------------------------------------------------------------------------------------------------------------------------------------------------------------------------------------------------------------------------------------------------------------------------------------------------------------------------------------------------------------------------------------------------------------------------------------------------------------------------------------------------------------------------------------------------------------------------------------------------------------------------------------------------------------------------------------------------------------------------------------------------------------------------------------------------------------------------------------------------------------------------------------------------------------------------------------------------------------------------------------------------------------------------------------------------------------------------------------------------------------------------------------------------------------------------------------------------------------------------------------------------------------------------------------------------------------------------------------------------------------------------------------------------------------------------------------------------------------------------------------------------|
| EMBASE   | (caroten*:ti,ab OR tetraterpene*:ti,ab OR lycopene:ti,ab OR cryptoxanthin:ti,ab OR capsorubin:ti,ab OR capsanthin:ti,ab OR lutein:ti,ab OR zeaxanthin:ti,ab OR betaxanthin:ti,ab OR violaxanthin:ti,ab OR xanthophyll*:ti,ab OR carotenoids/exp OR "betacarotene"/exp OR lycopene/exp OR xanthophylls/exp OR anthocyan*:ti,ab OR cyanidin:ti,ab OR malvidin:ti,ab OR peonidin:ti,ab OR delphinidin:ti,ab OR pelargonidin:ti,ab OR petunidin:ti,ab OR aurone*:ti,ab OR chalcone*:ti,ab OR anthoxanthin*:ti,ab OR flavonol*:ti,ab OR kaempferol:ti,ab OR quercetin:ti,ab OR myricetin:ti,ab OR flavone*:ti,ab OR apigenin:ti,ab OR luteolin:ti,ab OR isoetin:ti,ab OR tannin*:ti,ab OR proanthocyanidin*:ti,ab OR anthocyanins/exp OR flavonols/exp OR kaempferols/exp OR quercetin/exp OR chalcones/exp OR flavones/exp OR apigenin/exp OR luteolin/exp OR tannins/exp OR proanthocyanidins/exp OR betalain*:ti,ab OR betacyanin*:ti,ab OR betaxanthin*:ti,ab OR betanin:ti,ab OR indicaxanthin:ti,ab OR vulgaxanthin:ti,ab OR betalains/exp OR betacyanins/exp OR betaxanthins/exp OR chlorophyll*:ti,ab OR chlorophyll/exp OR "chlorophyll A"/exp) AND (systematic:ti,ab OR meta-analysis:ti,ab OR metaanalysis:ti,ab OR meta- analyses:ti,ab OR metaanalyses:ti,ab OR "literature review":ti,ab OR meta-regression:ti,ab OR umbrella:ti,ab OR term:it OR term:it OR term:it)                                                                                                                                                                                                                                                                                                                                                                                                                                                                                                                                                                                                                                                                                         |
| CINAHL   | ((TI caroten* OR AB caroten*) OR (TI tetraterpene* OR AB tetraterpene*) OR (TI lycopene OR AB lycopene) OR (TI cryptoxanthin OR AB cryptoxanthin) OR (TI capsorubin OR AB capsorubin) OR (TI capsanthin OR AB capsanthin) OR (TI lutein OR AB lutein) OR (TI zeaxanthin OR AB zeaxanthin) OR (TI betaxanthin OR AB betaxanthin) OR (TI violaxanthin OR AB violaxanthin) OR (TI xanthophyll* OR AB xanthophyll*) OR (MH carotenoids+) OR (MH "beta carotene"+) OR (MH lycopene+) OR (MH xanthophylls+) OR (TI anthocyan* OR AB anthocyan*) OR (TI cyanidin OR AB cyanidin) OR (TI malvidin OR AB malvidin) OR (TI peonidin OR AB peonidin) OR (TI delphinidin OR AB delphinidin) OR (TI pelargonidin OR AB pelargonidin) OR (TI petunidin OR AB petunidin) OR (TI aurone* OR AB aurone*) OR (TI chalcone* OR AB chalcone*) OR (TI anthoxanthin* OR AB anthoxanthin*) OR (TI flavonol* OR AB flavonol*) OR (TI kaempferol OR AB kaempferol) OR (TI quercetin OR AB quercetin) OR (TI myricetin OR AB myricetin) OR (TI flavone* OR AB flavone*) OR (TI apigenin OR AB apigenin) OR (TI luteolin OR AB luteolin) OR (TI isoetin OR AB isoetin) OR (TI tannin* OR AB tannin*) OR (TI proanthocyanidin* OR AB proanthocyanidin*) OR (MH anthocyanins+) OR (TI betalain* OR AB betalain*) OR (TI betacyanin* OR AB betacyanin*) OR (TI betaxanthin* OR AB betaxanthin*) OR (TI betanin OR AB betanin) OR (TI indicaxanthin OR AB indicaxanthin) OR (TI vulgaxanthin OR AB vulgaxanthin) OR (MH betalains+) OR (MH betacyanins+) OR (MH betaxanthins+) OR (TI chlorophyll* OR AB chlorophyll*) OR (MH chlorophyll+) OR (MH "chlorophyll A"+) AND ((TI systematic OR AB systematic) OR (TI meta-analysis OR AB meta-mnalysis) OR (TI metaanalysis OR AB metaanalysis) OR (TI meta-analyses OR AB meta-analyses) OR (TI metaanalyses OR AB metaanalyses) OR (TI "literature review" OR AB "literature review") OR (TI meta-regression OR AB meta-regression) OR (TI umbrella OR AB umbrella) OR PT "systematic review" OR PT "scientific integrity review" OR PT meta-analysis) |

---

|                      |                                                                                                                                                                                                                                                                                                                                                                                                                                                                                                                                                                                                                                                                                                                                                                                                                                                                                                                                                                                                                                                                                                                                                                                                                                                                                                                                                                                                                                                   |
|----------------------|---------------------------------------------------------------------------------------------------------------------------------------------------------------------------------------------------------------------------------------------------------------------------------------------------------------------------------------------------------------------------------------------------------------------------------------------------------------------------------------------------------------------------------------------------------------------------------------------------------------------------------------------------------------------------------------------------------------------------------------------------------------------------------------------------------------------------------------------------------------------------------------------------------------------------------------------------------------------------------------------------------------------------------------------------------------------------------------------------------------------------------------------------------------------------------------------------------------------------------------------------------------------------------------------------------------------------------------------------------------------------------------------------------------------------------------------------|
| The Cochrane Library | (caroten*:ti,ab OR tetraterpene*:ti,ab OR lycopene:ti,ab OR cryptoxanthin:ti,ab OR capsorubin:ti,ab OR capsanthin:ti,ab OR lutein:ti,ab OR zeaxanthin:ti,ab OR betaxanthin:ti,ab OR violaxanthin:ti,ab OR xanthophyll*:ti,ab OR [mh carotenoids] OR [mh "betacarotene"] OR [mh lycopene] OR [mh xanthophylls] OR anthocyan*:ti,ab OR cyanidin:ti,ab OR malvidin:ti,ab OR peonidin:ti,ab OR delphinidin:ti,ab OR pelargonidin:ti,ab OR petunidin:ti,ab OR aurone*:ti,ab OR chalcone*:ti,ab OR anthoxanthin*:ti,ab OR flavonol*:ti,ab OR kaempferol:ti,ab OR quercetin:ti,ab OR myricetin:ti,ab OR flavone*:ti,ab OR apigenin:ti,ab OR luteolin:ti,ab OR isoetin:ti,ab OR tannin*:ti,ab OR proanthocyanidin*:ti,ab OR [mh anthocyanins] OR [mh flavonols] OR [mh kaempferols] OR [mh quercetin] OR [mh chalcones] OR [mh flavones] OR [mh apigenin] OR [mh luteolin] OR [mh tannins] OR [mh proanthocyanidins] OR betalain*:ti,ab OR betacyanin*:ti,ab OR Betaxanthin*:ti,ab OR betanin:ti,ab OR indicaxanthin:ti,ab OR vulgaxanthin:ti,ab OR [mh betalains] OR [mh betacyanins] OR [mh betaxanthins] OR chlorophyll*:ti,ab OR [mh chlorophyll] OR [mh "chlorophyll A"]) AND (systematic:ti,ab OR meta-analysis:ti,ab OR metaanalysis:ti,ab OR meta-analyses:ti,ab OR metaanalyses:ti,ab OR "literature review":ti,ab OR meta-regression:ti,ab OR umbrella:ti,ab OR "systematic review":pt OR "scientific integrity review":pt OR meta-analysis:pt) |
|----------------------|---------------------------------------------------------------------------------------------------------------------------------------------------------------------------------------------------------------------------------------------------------------------------------------------------------------------------------------------------------------------------------------------------------------------------------------------------------------------------------------------------------------------------------------------------------------------------------------------------------------------------------------------------------------------------------------------------------------------------------------------------------------------------------------------------------------------------------------------------------------------------------------------------------------------------------------------------------------------------------------------------------------------------------------------------------------------------------------------------------------------------------------------------------------------------------------------------------------------------------------------------------------------------------------------------------------------------------------------------------------------------------------------------------------------------------------------------|

---

<sup>1</sup>Search strategy was designed in PubMed and translated to other databases using the Polygot Search Translator.



**Table S12.** Secondary systematic search strategy for Chlorophyll studies in PubMed, EMBASE, CINAHL and Cochrane Library.

| DATABASE             | SEARCH STRATEGY                                                                                                                                                                                                                                                                                                                                                                                                                                                                                                                                                                                                                                                                                                                                |
|----------------------|------------------------------------------------------------------------------------------------------------------------------------------------------------------------------------------------------------------------------------------------------------------------------------------------------------------------------------------------------------------------------------------------------------------------------------------------------------------------------------------------------------------------------------------------------------------------------------------------------------------------------------------------------------------------------------------------------------------------------------------------|
| PUBMED               | ((chlorophyll*[Title/Abstract]) OR (chlorophyll[MeSH Terms]) OR (chlorophyll A[MeSH Terms])) AND (("controlled trial"[Title/Abstract]) OR ("randomised trial"[Title/Abstract]) OR ("randomized trial"[Title/Abstract]) OR ("randomised study"[Title/Abstract]) OR ("randomized study"[Title/Abstract]) OR ("clinical trial"[Title/Abstract]) OR (RCT[Title/Abstract]) OR (placebo[Title/Abstract]) OR ("cohort study"[Title/Abstract]) OR (longitudinal[Title/Abstract]) OR ("prospective study"[Title/Abstract]) OR (clinical trial[Publication Type]) OR (controlled clinical trial[Publication Type]) OR (randomized clinical trial[Publication Type]) OR (observational study[Publication Type]) OR (comparative study[Publication Type])) |
| EMBASE               | (chlorophyll*:ti,ab) AND ("controlled trial":ti,ab OR "randomised trial":ti,ab OR "randomized trial":ti,ab OR "randomised study":ti,ab OR "randomized study":ti,ab OR "clinical trial":ti,ab OR RCT:ti,ab OR "cohort study":ti,ab OR longitudinal:ti,ab OR "prospective study":ti,ab))                                                                                                                                                                                                                                                                                                                                                                                                                                                         |
| CINAHL               | ((AB chlorophyll* OR TI chlorophyll*) AND ((TI "controlled trial" OR AB "controlled trial") OR (TI "randomised trial" OR AB "randomised trial") OR (TI "randomized trial" OR AB "randomized trial") OR (TI "randomised study" OR AB "randomised study") OR (TI "randomized study" OR AB "randomized study") OR (TI "clinical trial" OR AB "clinical trial") OR (TI RCT OR AB RCT) OR (TI "cohort study" OR AB "cohort study") OR (TI longitudinal OR AB longitudinal) OR (TI "prospective study" OR AB "prospective study"))                                                                                                                                                                                                                   |
| The Cochrane Library | (chlorophyll*:ti,ab,kw AND ((controlled trial):ti,ab,kw OR (randomised trial):ti,ab,kw OR (randomized trial):ti,ab,kw OR (randomised study):ti,ab,kw OR (randomized study):ti,ab,kw OR (clinical trial):ti,ab,kw OR RCT:ti,ab,kw OR (cohort study):ti,ab,kw OR longitudinal:ti,ab,kw OR (prospective study):ti,ab,kw))                                                                                                                                                                                                                                                                                                                                                                                                                         |

**Table S13.** Inter-rater reliability between reviewers at full text review.

| REVIEWER A | REVIEWER B | A INCLUDE,<br>B INCLUDE | A INCLUDE,<br>B EXCLUDE | A EXCLUDE,<br>B INCLUDE | A EXCLUDE,<br>B EXCLUDE | PROPORTIONATE<br>AGREEMENT | YES PROBABILITY | NO PROBABILITY | RANDOM<br>AGREEMENT<br>PROBABILITY | COHEN'S<br>KAPPA |
|------------|------------|-------------------------|-------------------------|-------------------------|-------------------------|----------------------------|-----------------|----------------|------------------------------------|------------------|
| HM         | MB         | 52                      | 21                      | 12                      | 106                     | 0.83                       | 0.13            | 0.41           | 0.54                               | 0.63             |
| MB         | SM         | 79                      | 7                       | 4                       | 159                     | 0.96                       | 0.12            | 0.44           | 0.55                               | 0.90             |
